# Supplementary material for: Patient-Reported Outcome Measures Used for Assessing Breast Sensation after Mastectomy: Not Fit for Purpose
Source: PubMed Central journal article supplement — Patient. 2022 Jan 18;15(4):435–44. doi: 10.1007/s40271-021-00565-5 (PMC9197899; doi:10.1007/s40271-021-00565-5), 2022-01-18
Supplement: 40271_2021_565_MOESM1_ESM.pdf [file 40271_2021_565_MOESM1_ESM.pdf]

## Online Resource 1

## Glossary

|                             |                                                                                                                                                                                                                                                                                              |
|-----------------------------|----------------------------------------------------------------------------------------------------------------------------------------------------------------------------------------------------------------------------------------------------------------------------------------------|
| <b>Article title</b>        | 'Patient-reported outcome measures used for assessing breast sensation after mastectomy: Not fit for purpose'                                                                                                                                                                                |
| <b>Journal name</b>         | <i>The Patient—Patient-Centered Outcomes Research</i>                                                                                                                                                                                                                                        |
| <b>Author names</b>         | Hansje P. Smeele; Rachel C. H. Dijkstra; Merel L. Kimman; René R. W. J. van der Hulst; Stefania M. H. Tuinder                                                                                                                                                                                |
| <b>Corresponding Author</b> | Stefania M. H. Tuinder. Department of Plastic, Reconstructive and Hand Surgery, GROW – School for Oncology and Developmental Biology, Maastricht University Medical Center; P.O. Box 5800, 6202 AZ, Maastricht, the Netherlands.<br><a href="mailto:s.tuinder@mumc.nl">s.tuinder@mumc.nl</a> |

**ad hoc patient-reported outcome measure.** Patient-reported outcome measure with unavailable details regarding development and measurement properties.

**affinity diagram.** Bottom-up data organization intended to define categories based on likeness of data.<sup>1</sup>

**concept.** The specific measurement goal (*i.e.*, the *thing* that is to be measured by a patient-reported outcome measure).<sup>2</sup>

**generic patient-reported outcome measure.** Patient-reported outcome measure that is applicable to a wide range of health conditions and treatments.<sup>3</sup>

**item.** An individual question or statement (and its standardized response options) that is evaluated by the patient to address the concept.<sup>2</sup>

**measurement properties.** Nine different aspects of reliability, validity, and responsiveness of a patient-reported outcome measure that together represent the measure's quality.<sup>4</sup>

**patient-reported outcome.** Report of the status of a patient's health condition (*e.g.*, quality of life, symptoms, treatment effects, functioning) elicited directly from the patient, without interpretation of the patient's response by a clinician or anyone else.<sup>2</sup>

**patient-reported outcome measure.** Tool (mostly questionnaires and surveys) used to measure a patient-reported outcome<sup>3</sup>: a report of the status of a patient's health condition (*e.g.*, quality of life, symptoms, treatment effects, functioning) elicited directly from the patient, without interpretation by a clinician or anyone else.<sup>2</sup>

**sensory modality.** An aspect of a stimulus or what is perceived after a stimulus. The basic sensory modalities include: light, sound, taste, temperature, pressure, and smell.<sup>5</sup>

## REFERENCES

1. Kolko J. Exposing the magic of design. New York, NY: Oxford University Press; 2011.
2. U.S. Department of Health and Human Services Food and Drug Administration. Guidance for Industry – Patient-Reported Outcome Measures: Use in Medical Product Development to Support Labeling Claims. 2009. <https://www.fda.gov/media/77832/download> (accessed March 2021).
3. OECD. Recommendations to OECD ministers of health from the high-level reflection group on the future of health statistics. Strengthening the international comparison of health system performance through patient-reported indicators. Paris: OECD; 2017. <https://www.oecd.org/els/health-systems/Recommendations-from-high-level-reflection-group-on-the-future-of-health-statistics.pdf> (accessed March 2021).

4. Mokkink L, Prinsen C, Patrick D, Alonso J, Bouter L, De Vet H, Terwee C (2018) COSMIN methodology for systematic reviews of patient-reported outcome measures (PROMs): User manual. [https://www.cosmin.nl/wp-content/uploads/COSMIN-syst-review-for-PROMs-manual\\_version-1\\_feb-2018.pdf](https://www.cosmin.nl/wp-content/uploads/COSMIN-syst-review-for-PROMs-manual_version-1_feb-2018.pdf) (accessed September 2021).
5. Sensory Modalities. 2020. <https://chem.libretexts.org/@go/page/7652> (accessed March 2021).
