# Supplementary material for: Patient-Reported Outcome Measures Used for Assessing Breast Sensation after Mastectomy: Not Fit for Purpose
Source: PubMed Central journal article supplement — Patient. 2022 Jan 18;15(4):435–44. doi: 10.1007/s40271-021-00565-5 (PMC9197899; doi:10.1007/s40271-021-00565-5), 2022-01-18
Supplement: 40271_2021_565_MOESM3_ESM.pdf [file 40271_2021_565_MOESM3_ESM.pdf]

### Online Resource 3

### List of extracted data items

|                             |                                                                                                                                                                                                                                                                                              |
|-----------------------------|----------------------------------------------------------------------------------------------------------------------------------------------------------------------------------------------------------------------------------------------------------------------------------------------|
| <b>Article title</b>        | 'Patient-reported outcome measures used for assessing breast sensation after mastectomy: Not fit for purpose'                                                                                                                                                                                |
| <b>Journal name</b>         | <i>The Patient—Patient-Centered Outcomes Research</i>                                                                                                                                                                                                                                        |
| <b>Author names</b>         | Hansje P. Smeele; Rachel C. H. Dijkstra; Merel L. Kimman; René R. W. J. van der Hulst; Stefania M. H. Tuinder                                                                                                                                                                                |
| <b>Corresponding Author</b> | Stefania M. H. Tuinder. Department of Plastic, Reconstructive and Hand Surgery, GROW – School for Oncology and Developmental Biology, Maastricht University Medical Center; P.O. Box 5800, 6202 AZ, Maastricht, the Netherlands.<br><a href="mailto:s.tuinder@mumc.nl">s.tuinder@mumc.nl</a> |

**Baseline information about the article** (first author, publication year, geographic origin, journal, study time period, funding sources)

#### 1. Study characteristics

- Study design
- Breast surgery type (*i.e.*, oncologic/non-oncologic, + details)
- Study population (*e.g.*, breast cancer gene mutation, elderly, obese, congenital breast deformity)
- Breast sensation as study endpoint (*i.e.*, primary/secondary)
- Sample size
- Mean patient age
- Time elapsed from surgery to survey
- Survey response rate (%)
- Non-respondent analysis (*i.e.*, yes/no)
- Additional quantitative sensory testing (*i.e.*, yes/no, + details)

#### 2. Patient-reported outcome measure characteristics

- Concept of interest
- Number of items
- Number of sensation-specific items
- Sensation-specific items + response options
- Does concept of breast sensation make up an independent score (*i.e.*, yes/no)
- Availability of details regarding development and measurement properties (*i.e.*, yes/no, + details)
- Mode of administration
