# Supplementary material for: Patient-Reported Outcome Measures Used for Assessing Breast Sensation after Mastectomy: Not Fit for Purpose
Source: PubMed Central journal article supplement — Patient. 2022 Jan 18;15(4):435–44. doi: 10.1007/s40271-021-00565-5 (PMC9197899; doi:10.1007/s40271-021-00565-5), 2022-01-18
Supplement: 40271_2021_565_MOESM4_ESM.pdf [file 40271_2021_565_MOESM4_ESM.pdf]

## Online Resource 4

## Characteristics of included studies and patient-reported outcome measures, with references

**Article title** 'Patient-reported outcome measures for assessing breast sensation after mastectomy: Not fit for purpose'  
**Journal name** *The Patient—Patient-Centered Outcomes Research*  
**Author names** Hansje P. Smeele; Rachel C. H. Dijkstra; Merel L. Kimman; René R. W. J. van der Hulst; Stefania M. H. Tuinder  
**Corresponding Author** Stefania M. H. Tuinder. Department of Plastic, Reconstructive and Hand Surgery, GROW – School for Oncology and Developmental Biology, Maastricht University Medical Center; P.O. Box 5800, 6202 AZ, Maastricht, the Netherlands. [s.tuinder@mumc.nl](mailto:s.tuinder@mumc.nl)

**Table 1** Characteristics of the included studies and patient-reported outcome measures

| Study (n = 135)                           | Study design       | Surgery type                                                                                | N <sup>a</sup> | Sensation endpoint | Measure (n = 124)                                                                      | Sensation items (n = 215)                                                                                                                                                                                                                                         | Response options                                                                                                                                                                                                                        | Item content <sup>b</sup>                                                                                                                                                                            |
|-------------------------------------------|--------------------|---------------------------------------------------------------------------------------------|----------------|--------------------|----------------------------------------------------------------------------------------|-------------------------------------------------------------------------------------------------------------------------------------------------------------------------------------------------------------------------------------------------------------------|-----------------------------------------------------------------------------------------------------------------------------------------------------------------------------------------------------------------------------------------|------------------------------------------------------------------------------------------------------------------------------------------------------------------------------------------------------|
| Abozeid <i>et al.</i> , 2018 <sup>1</sup> | Cross-sectional    | Reduction mammoplasty/mastopexy                                                             | 25             | Secondary          | <i>Ad hoc</i> <sup>1</sup>                                                             | "Satisfaction with nipple sensation after the operation"                                                                                                                                                                                                          | highly satisfied/satisfied/not satisfied                                                                                                                                                                                                | 1- nipple<br>2- sensation<br>3- satisf/import                                                                                                                                                        |
| Ahmed <i>et al.</i> , 2000 <sup>2</sup>   | Cross-sectional    | Reduction mammoplasty/mastopexy                                                             | 38             | Primary            | <i>Ad hoc</i> <sup>2</sup>                                                             | "How is your nipple sensation in comparison to prior to surgery?"                                                                                                                                                                                                 | same/better/worse                                                                                                                                                                                                                       | 1- nipple<br>2- sensation<br>3- comparative                                                                                                                                                          |
| Araco <i>et al.</i> , 2011 <sup>3</sup>   | Cross-sectional    | Augmentation mammoplasty                                                                    | 1222           | Primary            | <i>Ad hoc</i> <sup>3</sup>                                                             | "Postoperative degree of residual sensitivity compared to the pre-operative sensitivity"                                                                                                                                                                          | complete loss/reduced sensitivity/normal sensitivity                                                                                                                                                                                    | 1- breast<br>2- sensation<br>3- comparative                                                                                                                                                          |
| Banbury <i>et al.</i> , 2004 <sup>4</sup> | Prospective cohort | Augmentation mammoplasty                                                                    | 47             | Primary            | <i>Ad hoc</i> <sup>4</sup>                                                             | "How did the surgery affect your nipple sensation?"                                                                                                                                                                                                               | increased/no change/decreased                                                                                                                                                                                                           | 1- nipple<br>2- sensation<br>3- comparative                                                                                                                                                          |
| Baron <i>et al.</i> , 2000 <sup>5</sup>   | Cross-sectional    | Breast-conserving surgery/skin-sparing mastectomy + (expander-)implant-based reconstruction | 132            | Secondary          | Breast Sensation Assessment Scale (BSAS), subscale: discomfort, validated <sup>5</sup> | <ol style="list-style-type: none"> <li>"How often do you experience numbness in your breast?"</li> <li>"How severe is the numbness you experience in your breast?"</li> <li>"What level of distress causes the numbness you experience in the breast?"</li> </ol> | <ol style="list-style-type: none"> <li>4-point Likert scale from "rarely" to "almost constantly"</li> <li>4-point Likert scale from "slight" to "very severe"</li> <li>5-point Likert scale from "not at all" to "very much"</li> </ol> | <ol style="list-style-type: none"> <li>1- breast<br/>2- numbness<br/>3- absolute</li> <li>1- breast<br/>2- numbness<br/>3- satisf/import</li> <li>1- breast<br/>2- numbness<br/>3- impact</li> </ol> |

**Table 1** (continued)

| Study (n = 135)                              | Study design       | Surgery type                                                               | N <sup>a</sup> | Sensation endpoint | Measure (n = 124)           | Sensation items (n = 215)                                                                                                                             | Response options                                                                                                                                                                             | Item content <sup>b</sup>                                                                                   |
|----------------------------------------------|--------------------|----------------------------------------------------------------------------|----------------|--------------------|-----------------------------|-------------------------------------------------------------------------------------------------------------------------------------------------------|----------------------------------------------------------------------------------------------------------------------------------------------------------------------------------------------|-------------------------------------------------------------------------------------------------------------|
| Baumeister <i>et al.</i> , 1986 <sup>6</sup> | Cross-sectional    | Reduction mammoplasty/mastopexy                                            | 162            | Secondary          | <i>Ad hoc</i> <sup>6</sup>  | "Sensation of the nipple"                                                                                                                             | diminished/unchanged                                                                                                                                                                         | 1- nipple<br>2- sensation<br>3- comparative                                                                 |
| Berg <i>et al.</i> , 1995 <sup>7</sup>       | Cross-sectional    | Reduction mammoplasty/mastopexy                                            | 163            | Secondary          | <i>Ad hoc</i> <sup>7</sup>  | "Nipple-areola complex sensation"                                                                                                                     | decreased/not affected                                                                                                                                                                       | 1- nipple<br>2- sensation<br>3- comparative                                                                 |
| Blomqvist <i>et al.</i> , 1999 <sup>8</sup>  | Cross-sectional    | Mastectomy + reconstruction with autologous flap                           | 152            | Secondary          | <i>Ad hoc</i> <sup>8</sup>  | "Sensitivity to touch in the reconstructed breast in comparison with the contralateral breast"                                                        | reduced/equal/increased                                                                                                                                                                      | 1- breast<br>2- touch<br>3- comparative                                                                     |
| Blondeel <i>et al.</i> , 1999 <sup>9</sup>   | Cross-sectional    | Skin-sparing mastectomy + reconstruction with (innervated) autologous flap | 121            | Primary            | <i>Ad hoc</i> <sup>9</sup>  | <b>1.</b> "Do you have feeling in the reconstructed breast when touched?"<br><b>2.</b> "Do you have erogenous sensation in the reconstructed breast?" | <b>1.</b> yes/no/alternating areas of sensation and numbness<br><b>2.</b> yes/no                                                                                                             | <b>1.</b> 1- breast<br>2- touch<br>3- absolute<br><b>2.</b> 1- breast<br>2- erogenous<br>3- absolute        |
| Bodin <i>et al.</i> , 2008 <sup>10</sup>     | Cross-sectional    | Mastectomy + (expander-) implant-based reconstruction                      | 256            | Secondary          | <i>Ad hoc</i> <sup>10</sup> | "Satisfaction with sensitivity of the nipple"                                                                                                         | 4-point Likert scale from "very dissatisfied" to "very satisfied"                                                                                                                            | 1- nipple<br>2- sensation<br>3- satisf/import                                                               |
| Brandberg <i>et al.</i> , 2012 <sup>11</sup> | Prospective cohort | Skin-sparing mastectomy + (expander-)implant-based reconstruction          | 91             | Secondary          | <i>Ad hoc</i> <sup>11</sup> | "How is your breast sensation?"                                                                                                                       | 7-point Likert scale from "very bad" to "very good"                                                                                                                                          | 1- breast<br>2- sensation<br>3- absolute                                                                    |
| Brennan <i>et al.</i> , 2007 <sup>12</sup>   | Cross-sectional    | Augmentation mammoplasty                                                   | 484            | Secondary          | <i>Ad hoc</i> <sup>12</sup> | <b>1.</b> "Sensory disturbances"<br><b>2.</b> "Percentage change from preoperative sensation"                                                         | <b>1.</b> a score of 0.5 was given to each breast, resulting in a range of -1.0 (bilateral hypoesthesia) to +1.0 (bilateral hypesthesia) and "0" being no change in sensation<br><b>2.</b> % | <b>1.</b> 1- breast<br>2- sensation<br>3- absolute<br><b>2.</b> 1- breast<br>2- sensation<br>3- comparative |

**Table 1** (continued)

| Study (n = 135)                                      | Study design    | Surgery type                                                                                   | N <sup>a</sup> | Sensation endpoint | Survey (n = 124)                                               | Sensation items (n = 215)                                                                                                                                                                                                                                                                    | Response options                                                  | Item content <sup>b</sup>                                                                                                                                                                                                                                            |
|------------------------------------------------------|-----------------|------------------------------------------------------------------------------------------------|----------------|--------------------|----------------------------------------------------------------|----------------------------------------------------------------------------------------------------------------------------------------------------------------------------------------------------------------------------------------------------------------------------------------------|-------------------------------------------------------------------|----------------------------------------------------------------------------------------------------------------------------------------------------------------------------------------------------------------------------------------------------------------------|
| Bresser <i>et al.</i> , 2006 <sup>13</sup>           | Cross-sectional | Skin-sparing mastectomy + (expander-)implant-based reconstruction                              | 136            | Secondary          | <i>Ad hoc</i> <sup>13</sup>                                    | "Change in feeling of the breasts"                                                                                                                                                                                                                                                           | 5-point Likert scale from "no!" to "yes!"                         | 1- breast<br>2- sensation<br>3- comparative                                                                                                                                                                                                                          |
| Brown <i>et al.</i> , 2000 <sup>14</sup>             | Cross-sectional | Reduction mammoplasty/ mastopexy                                                               | 74             | Secondary          | Unclear validation thus considered <i>ad hoc</i> <sup>14</sup> | "Nipple sensation"                                                                                                                                                                                                                                                                           | 5-point Likert scale from "poor" to "excellent"                   | 1- nipple<br>2- sensation<br>3- absolute                                                                                                                                                                                                                             |
| Cardenas-Camarena <i>et al.</i> , 2009 <sup>15</sup> | Cross-sectional | Reduction mammoplasty/ mastopexy                                                               | 356            | Secondary          | <i>Ad hoc</i> <sup>15</sup>                                    | "Alteration in nipple-areola complex sensitivity"                                                                                                                                                                                                                                            | minimal/moderate/severe                                           | 1- nipple<br>2- sensation<br>3- comparative                                                                                                                                                                                                                          |
| Casaubon <i>et al.</i> , 2020 <sup>16</sup>          | Cross-sectional | Breast-conserving surgery/ nipple-sparing mastectomy + (expander-)implant-based reconstruction | 600            | Secondary          | <i>Ad hoc</i> <sup>16</sup>                                    | "How pleasurable is it to have your treated/reconstructed breast caressed or stimulated, now?"                                                                                                                                                                                               | 5-point Likert scale form "very unpleasant" to "very pleasurable" | 1- breast<br>2- erogenous<br>3- absolute                                                                                                                                                                                                                             |
| Cerovac <i>et al.</i> , 2005 <sup>17</sup>           | Cross-sectional | Reduction mammoplasty/ mastopexy                                                               | 90             | Secondary          | <i>Ad hoc</i> <sup>18</sup>                                    | "Nipple sensation"                                                                                                                                                                                                                                                                           | unchanged/increased/diminished or lost                            | 1- nipple<br>2- sensation<br>3- comparative                                                                                                                                                                                                                          |
| Chapman <i>et al.</i> , 2006 <sup>18</sup>           | Cross-sectional | Lactiferous duct excision                                                                      | 87             | Secondary          | <i>Ad hoc</i> <sup>18</sup>                                    | <ol style="list-style-type: none"> <li>1. "Did you experience postoperative sensory loss?"</li> <li>2. "Did the loss of sensation improve with time?"</li> <li>3. "Did sensory loss affect your quality of life?"</li> <li>4. "Did you maintain erectile function of the nipple?"</li> </ol> | yes/no                                                            | <ol style="list-style-type: none"> <li>1. 1- breast<br/>2- sensation<br/>3- absolute</li> <li>2. 1- breast<br/>2- sensation<br/>3- comparative</li> <li>3. 1- breast<br/>2- sensation<br/>3- impact</li> <li>4. 1- nipple<br/>2- erection<br/>3- absolute</li> </ol> |
| Chen <i>et al.</i> , 1997 <sup>19</sup>              | Cross-sectional | Reduction mammoplasty/ mastopexy                                                               | 36             | Secondary          | <i>Ad hoc</i> <sup>19</sup>                                    | "Nipple-areola complex sensitivity"                                                                                                                                                                                                                                                          | unchanged/increased/decreased                                     | 1- nipple<br>2- sensation<br>3- comparative                                                                                                                                                                                                                          |
| Cheng <i>et al.</i> , 2004 <sup>20</sup>             | Cross-sectional | Skin-sparing mastectomy + reconstruction:<br>1. (expander-)implant                             | 25             | Secondary          | <i>Ad hoc</i> <sup>20</sup>                                    | "Sensation of the nipple-areola complex"                                                                                                                                                                                                                                                     | 4-point Likert scale from "not pleased                            | 1- nipple<br>2- sensation<br>3- satisf/import                                                                                                                                                                                                                        |

**Table 1** (continued)

| Study<br>(n = 135)                                      | Study<br>design                   | Surgery type                                                                     | N <sup>a</sup> | Sensation<br>endpoint | Survey<br>(n = 124)         | Sensation items<br>(n = 215)                                                                                                                                                                                                                                                                                                                                                                                                                                               | Response options                                                                                                                                                                                                                                            | Item content <sup>b</sup>                                                                                                                                                                                                         |
|---------------------------------------------------------|-----------------------------------|----------------------------------------------------------------------------------|----------------|-----------------------|-----------------------------|----------------------------------------------------------------------------------------------------------------------------------------------------------------------------------------------------------------------------------------------------------------------------------------------------------------------------------------------------------------------------------------------------------------------------------------------------------------------------|-------------------------------------------------------------------------------------------------------------------------------------------------------------------------------------------------------------------------------------------------------------|-----------------------------------------------------------------------------------------------------------------------------------------------------------------------------------------------------------------------------------|
|                                                         |                                   | 2. autologous flap<br>3. latissimus dorsi flap +<br>implant                      |                |                       |                             |                                                                                                                                                                                                                                                                                                                                                                                                                                                                            | at all" to "very<br>pleased"                                                                                                                                                                                                                                |                                                                                                                                                                                                                                   |
| Chiari <i>et al.</i> ,<br>2012 <sup>21</sup>            | Prospective<br>cohort             | Reduction mammoplasty/<br>mastopexy                                              | 64             | Primary               | <i>Ad hoc</i> <sup>21</sup> | <b>1.</b> "Intensity of nipple-areola<br>complex sensitivity"<br><b>2.</b> "Quality of nipple-areola<br>complex sensitivity"                                                                                                                                                                                                                                                                                                                                               | <b>1.</b> same as before/<br>less than before/<br>more than before<br><b>2.</b> same as before/<br>more pleasant than<br>before/less pleasant<br>than before/<br>"different"                                                                                | <b>1.</b> 1- nipple<br>2- sensation<br>3- comparative<br><b>2.</b> 1- nipple<br>2- erogenous<br>3- comparative                                                                                                                    |
| Cho <i>et al.</i> ,<br>2008 <sup>22</sup>               | Cross-<br>sectional               | Reduction mammoplasty/<br>mastopexy                                              | 41             | Secondary             | <i>Ad hoc</i> <sup>22</sup> | "Sensation of the nipple-areola<br>complex"                                                                                                                                                                                                                                                                                                                                                                                                                                | 4-point Likert scale<br>from "bad" to<br>"excellent"                                                                                                                                                                                                        | 1- nipple<br>2- sensation<br>3- absolute                                                                                                                                                                                          |
| Coelho de<br>Almeida <i>et al.</i> , 2004 <sup>23</sup> | Cross-<br>sectional               | Reduction mammoplasty/<br>mastopexy                                              | >500           | Secondary             | <i>Ad hoc</i> <sup>23</sup> | "Nipple sensation"                                                                                                                                                                                                                                                                                                                                                                                                                                                         | normal sensation/<br>sensation present<br>but abnormal/no<br>sensation                                                                                                                                                                                      | 1- nipple<br>2- sensation<br>3- absolute                                                                                                                                                                                          |
| Cornelissen<br><i>et al.</i> ,<br>2018 <sup>24</sup>    | Cross-<br>sectional               | Skin-sparing mastectomy +<br>reconstruction with<br>(innervated) autologous flap | 32             | Secondary             | <i>Ad hoc</i> <sup>24</sup> | <b>1.</b> "Do you have sensation in<br>your reconstructed breast(s)?"<br><b>2.</b> "Does the sensation in your<br>reconstructed breast resemble<br>the sensation of your healthy<br>breast before operation?"<br><b>3.</b> "Do you find it important that<br>your reconstructed breast has<br>sensation?"<br><b>4.</b> "How important is the return<br>of sensation in your<br>reconstructed breast for your<br>overall satisfaction with the<br>result of the operation?" | <b>1.</b> 5-point Likert<br>scale from "very<br>much" to "very<br>little"<br><b>2.</b> 5-point Likert<br>scale from "the<br>same" to "totally<br>different"<br><b>3.</b> + <b>4.</b> 5-point<br>Likert scale from<br>"not important" to<br>"very important" | <b>1.</b> 1- breast<br>2- sensation<br>3- absolute<br><b>2.</b> 1- breast<br>2- sensation<br>3- comparative<br><b>3.</b> 1- breast<br>2- sensation<br>3- satisf/import<br><b>4.</b> 1- breast<br>2- sensation<br>3- satisf/import |
| Cruz-Korchin<br><i>et al.</i> ,<br>2003 <sup>25</sup>   | Randomized<br>controlled<br>trial | Reduction mammoplasty/<br>mastopexy                                              | 208            | Secondary             | <i>Ad hoc</i> <sup>25</sup> | "Indicate the extent to which<br>you were satisfied with<br>sensation over the nipple-areola<br>area of the breast after<br>surgery"                                                                                                                                                                                                                                                                                                                                       | 10-point VAS from<br>"very disappointed"<br>to "very pleased"                                                                                                                                                                                               | 1- nipple<br>2- sensation<br>3- satisf/import                                                                                                                                                                                     |

**Table 1** (continued)

| Study (n = 135)                                 | Study design       | Surgery type                                                      | N <sup>a</sup> | Sensation endpoint | Survey (n = 124)                                               | Sensation items (n = 215)                                                                                                                                                                                                                                                                                                                                                                                                                                                                                                                                | Response options                                                                                                                                                                                                                                                                 | Item content <sup>b</sup>                                                                                                                                                                                                                                                                                                           |
|-------------------------------------------------|--------------------|-------------------------------------------------------------------|----------------|--------------------|----------------------------------------------------------------|----------------------------------------------------------------------------------------------------------------------------------------------------------------------------------------------------------------------------------------------------------------------------------------------------------------------------------------------------------------------------------------------------------------------------------------------------------------------------------------------------------------------------------------------------------|----------------------------------------------------------------------------------------------------------------------------------------------------------------------------------------------------------------------------------------------------------------------------------|-------------------------------------------------------------------------------------------------------------------------------------------------------------------------------------------------------------------------------------------------------------------------------------------------------------------------------------|
| Cruz-Korchin <i>et al.</i> , 2004 <sup>26</sup> | Cross-sectional    | Reduction mammoplasty/ mastopexy                                  | 58             | Secondary          | <i>Ad hoc</i> <sup>26-28</sup>                                 | "Do you have absent nipple sensation after surgery?"                                                                                                                                                                                                                                                                                                                                                                                                                                                                                                     | yes/no                                                                                                                                                                                                                                                                           | 1- nipple<br>2- sensation<br>3- absolute                                                                                                                                                                                                                                                                                            |
| Cruz <i>et al.</i> , 2007 <sup>27</sup>         | Cross-sectional    | Reduction mammoplasty/ mastopexy                                  | 164            | Secondary          |                                                                |                                                                                                                                                                                                                                                                                                                                                                                                                                                                                                                                                          |                                                                                                                                                                                                                                                                                  |                                                                                                                                                                                                                                                                                                                                     |
| Cruz <i>et al.</i> , 2010 <sup>28</sup>         | Cross-sectional    | Augmentation mammoplasty                                          | 105            | Secondary          |                                                                |                                                                                                                                                                                                                                                                                                                                                                                                                                                                                                                                                          |                                                                                                                                                                                                                                                                                  |                                                                                                                                                                                                                                                                                                                                     |
| Dahlbäck <i>et al.</i> , 2016 <sup>29</sup>     | Prospective cohort | Breast-conserving surgery                                         | 297            | Secondary          | Unclear validation thus considered <i>ad hoc</i> <sup>29</sup> | "How satisfied are you with skin sensitivity in the breast?"                                                                                                                                                                                                                                                                                                                                                                                                                                                                                             | 5-point Likert scale from "dissatisfied" to "very satisfied"                                                                                                                                                                                                                     | 1- breast<br>2- sensation<br>3- satisf/import                                                                                                                                                                                                                                                                                       |
| Damen <i>et al.</i> , 2010 <sup>30</sup>        | Cross-sectional    | Skin-sparing mastectomy + reconstruction with autologous flap     | 70             | Secondary          | <i>Ad hoc</i> <sup>30</sup>                                    | "Did the operation change the feeling in your breast(s)?"                                                                                                                                                                                                                                                                                                                                                                                                                                                                                                | 5-point Likert scale from "no!" to "yes!"                                                                                                                                                                                                                                        | 1- breast<br>2- sensation<br>3- absolute                                                                                                                                                                                                                                                                                            |
| De Vita <i>et al.</i> , 2014 <sup>31</sup>      | Cross-sectional    | Skin-sparing mastectomy + (expander-)implant-based reconstruction | 15             | Secondary          | <i>Ad hoc</i> <sup>31</sup>                                    | "Sensitivity of the nipple-areola complex"                                                                                                                                                                                                                                                                                                                                                                                                                                                                                                               | 10-point VAS                                                                                                                                                                                                                                                                     | 1- nipple<br>2- sensation<br>3- absolute                                                                                                                                                                                                                                                                                            |
| Delay <i>et al.</i> , 2000 <sup>32</sup>        | Cross-sectional    | Skin-sparing mastectomy + reconstruction with autologous flap     | 50             | Primary            | <i>Ad hoc</i> <sup>32</sup>                                    | <ol style="list-style-type: none"> <li>1. "How would you rate the sensitivity of your reconstructed breast?"</li> <li>2. "How would you compare the sensitivity of your reconstructed breast with that of the other breast?"</li> <li>3. "Which segment of your reconstructed breast is the most sensitive?"</li> <li>4. "How would you rate the erogenous sensation of your reconstructed breast?"</li> <li>5. "How important is return of feeling in your reconstructed breast to your overall satisfaction, besides the aesthetic result?"</li> </ol> | <ol style="list-style-type: none"> <li>1. very fine/ fine/poor/none</li> <li>2. much less/less/ equal to/greater</li> <li>3. see diagram: 1/2/3/4/5/6/7</li> <li>4. very much/ some/little/none</li> <li>5. very important/ important/not very important/ unimportant</li> </ol> | <ol style="list-style-type: none"> <li>1. 1- breast<br/>2- sensation<br/>3- absolute</li> <li>2. 1- breast<br/>2- sensation<br/>3- comparative</li> <li>3. 1- breast<br/>2- sensation<br/>3- absolute</li> <li>4. 1- breast<br/>2- erogenous<br/>3- absolute</li> <li>5. 1- breast<br/>2- sensation<br/>3- satisf/import</li> </ol> |

**Table 1** (continued)

| Study (n = 135)                            | Study design       | Surgery type                                                                                                         | N <sup>a</sup> | Sensation endpoint | Survey (n = 124)                                                            | Sensation items (n = 215)                                                                                                                                                                                                                                                                                                                                                                                                                                                                               | Response options                                                                                                                                                                                                                                                                       | Item content <sup>b</sup>                                                                                                                                                                                                                                                                                                |
|--------------------------------------------|--------------------|----------------------------------------------------------------------------------------------------------------------|----------------|--------------------|-----------------------------------------------------------------------------|---------------------------------------------------------------------------------------------------------------------------------------------------------------------------------------------------------------------------------------------------------------------------------------------------------------------------------------------------------------------------------------------------------------------------------------------------------------------------------------------------------|----------------------------------------------------------------------------------------------------------------------------------------------------------------------------------------------------------------------------------------------------------------------------------------|--------------------------------------------------------------------------------------------------------------------------------------------------------------------------------------------------------------------------------------------------------------------------------------------------------------------------|
| Didier <i>et al.</i> , 2009 <sup>33</sup>  | Cross-sectional    | Skin-sparing mastectomy/ nipple-sparing mastectomy + (expander-)implant-based reconstruction + nipple reconstruction | 453            | Secondary          | Satisfaction with plastic-surgery cosmetic results, validated <sup>33</sup> | <ol style="list-style-type: none"> <li>1. "Regarding the breast operated and reconstructed: have you been satisfied with your breast skin sensitivity?"</li> <li>2. "Have you been satisfied with the skin sensitivity of your other breast (if remodeled)?"</li> <li>3. "During the last four weeks, have you felt satisfied with your nipple sensitivity?"</li> </ol>                                                                                                                                 | 5-point Likert scale from "not at all" to "very much"                                                                                                                                                                                                                                  | <ol style="list-style-type: none"> <li>1. 1- breast 2- sensation 3- satisf/import</li> <li>2. 1- breast 2- sensation 3- satisf/import</li> <li>3. 1- nipple 2- sensation 3- satisf/import</li> </ol>                                                                                                                     |
| Dixon <i>et al.</i> , 1998 <sup>34</sup>   | Cross-sectional    | Lactiferous duct excision                                                                                            | 110            | Secondary          | <i>Ad hoc</i> <sup>34</sup>                                                 | "Nipple sensitivity"                                                                                                                                                                                                                                                                                                                                                                                                                                                                                    | unchanged/ increased/ decreased/ absent or numb                                                                                                                                                                                                                                        | <ol style="list-style-type: none"> <li>1- nipple</li> <li>2- sensation</li> <li>3- comparative</li> </ol>                                                                                                                                                                                                                |
| Djohan <i>et al.</i> , 2010 <sup>35</sup>  | Cross-sectional    | Nipple-sparing mastectomy + reconstruction:<br>1. (expander-)implant<br>2. autologous flap                           | 141            | Secondary          | <i>Ad hoc</i> <sup>35</sup>                                                 | <ol style="list-style-type: none"> <li>1. "Nipple-areola complex sensation"</li> <li>2. "Nipple-areola complex arousal"</li> </ol>                                                                                                                                                                                                                                                                                                                                                                      | 4-point Likert scale from "poor" to "excellent"                                                                                                                                                                                                                                        | <ol style="list-style-type: none"> <li>1. 1- nipple 2- sensation 3- absolute</li> <li>2. 1- nipple 2- erogenous 3- absolute</li> </ol>                                                                                                                                                                                   |
| Dossett <i>et al.</i> , 2016 <sup>36</sup> | Prospective cohort | Skin-sparing mastectomy/ nipple-sparing mastectomy + reconstruction:<br>1. (expander-)implant<br>2. autologous flap  | 53             | Secondary          | Unclear validation thus considered <i>ad hoc</i> <sup>36</sup>              | <ol style="list-style-type: none"> <li>1. "Satisfaction with sensation of your nipples in intimate or sexual activities"</li> <li>2. "Satisfaction with sensation of your nipples in leisure or social activities"</li> <li>3. "Satisfaction with sensation of your nipples in job-related situations"</li> <li>4. "When my breast is stimulated, I become sexually aroused."</li> <li>5. "When my nipple is stimulated, I become sexually aroused."</li> <li>6. "How important is return of</li> </ol> | <ol style="list-style-type: none"> <li>1. - 3. 5-point Likert scale from "very dissatisfied" to "very satisfied"</li> <li>4. + 5. 5-point Likert scale from "strongly disagree" to "strongly agree"</li> <li>6. 4-point Likert scale from "unimportant" to "very important"</li> </ol> | <ol style="list-style-type: none"> <li>1. 1- nipple 2- erogenous 3- satisf/import</li> <li>2. 1- nipple 2- sensation 3- satisf/import</li> <li>3. 1- nipple 2- sensation 3- satisf/import</li> <li>4. 1- breast 2- erogenous 3- absolute</li> <li>5. 1- nipple 2- erogenous 3- absolute</li> <li>6. 1- breast</li> </ol> |

**Table 1** (continued)

| Study<br>(n = 135)                               | Study<br>design    | Surgery type                                                                | N <sup>a</sup> | Sensation<br>endpoint | Survey<br>(n = 124)         | Sensation items<br>(n = 215)                                                                                                                                             | Response options        | Item content <sup>b</sup>                                                                                                                                                                                             |
|--------------------------------------------------|--------------------|-----------------------------------------------------------------------------|----------------|-----------------------|-----------------------------|--------------------------------------------------------------------------------------------------------------------------------------------------------------------------|-------------------------|-----------------------------------------------------------------------------------------------------------------------------------------------------------------------------------------------------------------------|
|                                                  |                    |                                                                             |                |                       |                             | feeling in your reconstructed breast to your overall satisfaction, besides the aesthetic result?"                                                                        |                         | 2- sensation<br>3- satisf/import                                                                                                                                                                                      |
| Edsander-Nord <i>et al.</i> , 1999 <sup>37</sup> | Cross-sectional    | Mastectomy + reconstruction with autologous flap                            | 26             | Primary               | <i>Ad hoc</i> <sup>37</sup> | <b>1.</b> "Touch sensibility in the reconstructed breast"<br><b>2.</b> "Thermal sensibility in the reconstructed breast"                                                 | yes/no                  | <b>1.</b> 1- breast<br>2- touch<br>3- absolute<br><b>2.</b> 1- breast<br>2- temperature<br>3- absolute                                                                                                                |
| Edsander-Nord <i>et al.</i> , 2002 <sup>38</sup> | Prospective cohort | Mastectomy + breast reconstruction + nipple reconstruction                  | 50             | Primary               | <i>Ad hoc</i> <sup>38</sup> | <b>1.</b> "Does the nipple become erect?"<br><b>2.</b> "Does the nipple feel as it did before the procedure?"                                                            | yes/no                  | <b>1.</b> 1- nipple<br>2- erection<br>3- absolute<br><b>2.</b> 1- nipple<br>2- sensation<br>3- comparative                                                                                                            |
| Eggert <i>et al.</i> , 2009 <sup>39</sup>        | Cross-sectional    | Reduction mammoplasty/ mastopexy                                            | 57             | Secondary             | <i>Ad hoc</i> <sup>39</sup> | <b>1.</b> "Can you feel touch?"<br><b>2.</b> "Can you feel heat/cold?"<br><b>3.</b> "Is the sensitivity still improving?"<br><b>4.</b> "Do you have sexual sensitivity?" | yes/no                  | <b>1.</b> 1- breast<br>2- touch<br>3- absolute<br><b>2.</b> 1- breast<br>2- temperature<br>3- absolute<br><b>3.</b> 1- breast<br>2- sensation<br>3- comparative<br><b>4.</b> 1- breast<br>2- erogenous<br>3- absolute |
| Eichler <i>et al.</i> , 2013 <sup>40</sup>       | Cross-sectional    | Breast-conserving surgery                                                   | 143            | Secondary             | <i>Ad hoc</i> <sup>40</sup> | "Has sensitivity changed in the nipple-areola complex?"                                                                                                                  | increased/<br>decreased | 1- nipple<br>2- sensation<br>3- comparative                                                                                                                                                                           |
| El-Ali <i>et al.</i> , 2009 <sup>41</sup>        | Cross-sectional    | Mastectomy + reconstruction:<br>1. (expander-)implant<br>2. autologous flap | 55             | Secondary             | <i>Ad hoc</i> <sup>41</sup> | "Tactile sensation of the reconstructed nipple in comparison to the normal side"                                                                                         | 10-point VAS            | 1- nipple<br>2- touch<br>3- comparative                                                                                                                                                                               |

**Table 1** (continued)

| Study<br>(n = 135)                             | Study<br>design     | Surgery type                                                                                                                                       | N <sup>a</sup> | Sensation<br>endpoint | Survey<br>(n = 124)            | Sensation items<br>(n = 215)                                                                                                                                                                                                                                                                                                       | Response options                                                                    | Item content <sup>b</sup>                                                                                                                                             |
|------------------------------------------------|---------------------|----------------------------------------------------------------------------------------------------------------------------------------------------|----------------|-----------------------|--------------------------------|------------------------------------------------------------------------------------------------------------------------------------------------------------------------------------------------------------------------------------------------------------------------------------------------------------------------------------|-------------------------------------------------------------------------------------|-----------------------------------------------------------------------------------------------------------------------------------------------------------------------|
|                                                |                     | 3. latissimus dorsi flap +<br>implant<br>+ nipple reconstruction                                                                                   |                |                       |                                |                                                                                                                                                                                                                                                                                                                                    |                                                                                     |                                                                                                                                                                       |
| Evans <i>et al.</i> ,<br>1994 <sup>42</sup>    | Cross-<br>sectional | Reduction mammoplasty/<br>mastopexy                                                                                                                | 16             | Secondary             | <i>Ad hoc</i> <sup>42</sup>    | "Nipple sensation"                                                                                                                                                                                                                                                                                                                 | same/decreased/<br>increased                                                        | 1- nipple<br>2- sensation<br>3- comparative                                                                                                                           |
| Gahm <i>et al.</i> ,<br>2007 <sup>43</sup>     | Cross-<br>sectional | Skin-sparing mastectomy +<br>(expander-)implant-based<br>reconstruction                                                                            | 24             | Primary               |                                | <b>1.</b> "Has your ability to feel<br>sensation on the nipple changed<br>after your breast surgery?"<br><b>2.</b> "Has your ability to feel touch<br>on the breast skin changed<br>after your breast surgery?"<br><b>3.</b> "Has your ability to feel cold<br>on the breast skin changed<br>after your breast surgery?"           |                                                                                     | <b>1.</b> 1- nipple<br>2- sensation<br>3- comparative<br><b>2.</b> 1- breast<br>2- touch<br>3- comparative<br><b>3.</b> 1- breast<br>2- temperature<br>3- comparative |
| Gahm <i>et al.</i> ,<br>2013 <sup>44</sup>     | Cross-<br>sectional | Skin-sparing mastectomy +<br>(expander-)implant-based<br>reconstruction                                                                            | 46             | Primary               | <i>Ad hoc</i> <sup>43,44</sup> | <b>4.</b> "Has your ability to feel heat<br>on the breast skin changed<br>after your breast surgery?"<br><b>5.</b> "Has your ability to feel pain<br>in the breast skin changed after<br>your breast surgery?"<br><b>6.</b> "Has your ability to feel<br>sexual sensations in the breast<br>changed after your breast<br>surgery?" | 8-point Likert scale<br>from "have no<br>sensation" to<br>"unchanged<br>sensation"  | <b>4.</b> 1- breast<br>2- temperature<br>3- comparative<br><b>5.</b> 1- breast<br>2- pain<br>3- comparative<br><b>6.</b> 1- breast<br>2- erogenous<br>3- comparative  |
| Ghosh <i>et al.</i> ,<br>1997 <sup>45</sup>    | Cross-<br>sectional | Mastectomy +<br>reconstruction:<br>1. (expander-)implant<br>2. autologous flap<br>3. latissimus dorsi flap +<br>implant<br>+ nipple reconstruction | 22             | Secondary             | <i>Ad hoc</i> <sup>45</sup>    | "Nipple sensation"                                                                                                                                                                                                                                                                                                                 | 5-point Likert scale<br>from "not pleased"<br>to "very pleased"                     | 1- nipple<br>2- sensation<br>3- satisf/import                                                                                                                         |
| Glaumann <i>et al.</i> ,<br>1985 <sup>46</sup> | Cross-<br>sectional | Skin-sparing mastectomy +<br>reconstruction:<br>1. (expander-)implant<br>2. autologous flap                                                        | 72             | Secondary             | <i>Ad hoc</i> <sup>46</sup>    | <b>1.</b> "Perception of touch in the<br>nipple-areola complex"<br><b>2.</b> "Presence of erotic feeling in<br>the nipple-areola complex"                                                                                                                                                                                          | normal sensitivity/<br>decreased<br>sensitivity/no<br>sensitivity/<br>hyperesthesia | <b>1.</b> 1- nipple<br>2- touch<br>3- absolute<br><b>2.</b> 1- nipple<br>2- erogenous<br>3- absolute                                                                  |



**Table 1** (continued)

| Study (n = 135)                             | Study design                | Surgery type                                                                                                        | N <sup>a</sup> | Sensation endpoint | Survey (n = 124)               | Sensation items (n = 215)                                                                                                                                                                                          | Response options                                                                                               | Item content <sup>b</sup>                                                                                                                             |
|---------------------------------------------|-----------------------------|---------------------------------------------------------------------------------------------------------------------|----------------|--------------------|--------------------------------|--------------------------------------------------------------------------------------------------------------------------------------------------------------------------------------------------------------------|----------------------------------------------------------------------------------------------------------------|-------------------------------------------------------------------------------------------------------------------------------------------------------|
| Gullo <i>et al.</i> , 2011 <sup>47</sup>    | Cross-sectional             | Skin-sparing mastectomy + reconstruction:<br>1. (expander-)implant<br>2. autologous flap<br>+ nipple reconstruction | 218            | Secondary          | <i>Ad hoc</i> <sup>47</sup>    | "Sensation of the nipple"                                                                                                                                                                                          | 10-point VAS                                                                                                   | 1- nipple<br>2- sensation<br>3- absolute                                                                                                              |
| Hang-Fu <i>et al.</i> , 1991 <sup>48</sup>  | Cross-sectional             | Reduction mammoplasty/<br>mastopexy                                                                                 | 410            | Secondary          | <i>Ad hoc</i> <sup>48</sup>    | <b>1.</b> "Sensation loss of breasts"<br><b>2.</b> "Sensation loss of nipple-areola"                                                                                                                               | yes/no                                                                                                         | <b>1.</b> 1- breast<br>2- sensation<br>3- absolute<br><b>2.</b> 1- nipple<br>2- sensation<br>3- absolute                                              |
| Harcourt <i>et al.</i> , 2011 <sup>49</sup> | Cross-sectional             | Mastectomy + breast reconstruction + nipple reconstruction                                                          | 247            | Secondary          | <i>Ad hoc</i> <sup>49</sup>    | "How satisfied are you with the sensation in your reconstructed nipple(s)?"                                                                                                                                        | 5-point Likert scale from "very dissatisfied" to "very satisfied"                                              | 1- nipple<br>2- sensation<br>3- satisf/import                                                                                                         |
| Hart <i>et al.</i> , 2016 <sup>50</sup>     | Cross-sectional             | Skin-sparing mastectomy + reconstruction:<br>1. (expander-)implant<br>2. autologous flap                            | 96             | Secondary          | <i>Ad hoc</i> <sup>50</sup>    | <b>1.</b> "I am less able to feel sexual sensations in my breasts than before surgery."<br><b>2.</b> "The loss of sensation in my breasts has negatively affected my sex life."                                    | 5-point Likert scale from "strongly disagree" to "strongly agree"                                              | <b>1.</b> 1- breast<br>2- erogenous<br>3- comparative<br><b>2.</b> 1- breast<br>2- erogenous<br>3- impact                                             |
| Haslik <i>et al.</i> , 2015 <sup>51</sup>   | Cross-sectional             | Skin-sparing mastectomy + reconstruction:<br>1. (expander-)implant<br>2. autologous flap<br>+ nipple reconstruction | 36             | Secondary          | <i>Ad hoc</i> <sup>51</sup>    | "Satisfaction with the sensitivity of the nipple after nipple-sharing"                                                                                                                                             | 4-point Likert scale from "very dissatisfied" to "very satisfied"                                              | 1- nipple<br>2- sensation<br>3- satisf/import                                                                                                         |
| Hau <i>et al.</i> , 2013 <sup>52</sup>      | Randomized controlled trial | Breast-conserving surgery                                                                                           | 688            | Secondary          | <i>Ad hoc</i> <sup>52</sup>    | "Breast sensitivity"                                                                                                                                                                                               | 4-point Likert scale from "poor" to "excellent"                                                                | 1- breast<br>2- sensation<br>3- absolute                                                                                                              |
| Hefter <i>et al.</i> , 2003 <sup>53</sup>   | Cross-sectional             | Reduction mammoplasty/<br>mastopexy                                                                                 | 72             | Secondary          | <i>Ad hoc</i> <sup>53,54</sup> | <b>1.</b> "Change in sensitivity of areola-nipple"<br><b>2.</b> "Postoperative erogenous function of the nipple-areola complex"<br><b>3.</b> "How long did it take for nipple-areola complex sensation to return?" | <b>1. + 2.</b> improvement/<br>no change/mildly reduced sensation/<br>50% decrease of sensation<br><b>3. ?</b> | <b>1.</b> 1- nipple<br>2- sensation<br>3- comparative<br><b>2.</b> 1- nipple<br>2- erogenous<br>3- comparative<br><b>3.</b> 1- nipple<br>2- sensation |
| Hefter <i>et al.</i> , 2003 <sup>54</sup>   | Cross-sectional             | Reduction mammoplasty/<br>mastopexy                                                                                 | 101            | Primary            |                                |                                                                                                                                                                                                                    |                                                                                                                |                                                                                                                                                       |

**Table 1** (continued)

| Study<br>(n = 135)                               | Study<br>design       | Surgery type                                                                                   | N <sup>a</sup> | Sensation<br>endpoint | Survey<br>(n = 124)                                                                                                                                      | Sensation items<br>(n = 215)                                                                                                                                                                                                                | Response options                                                                                                                                            | Item content <sup>b</sup>                                                                                                                                                                                            |
|--------------------------------------------------|-----------------------|------------------------------------------------------------------------------------------------|----------------|-----------------------|----------------------------------------------------------------------------------------------------------------------------------------------------------|---------------------------------------------------------------------------------------------------------------------------------------------------------------------------------------------------------------------------------------------|-------------------------------------------------------------------------------------------------------------------------------------------------------------|----------------------------------------------------------------------------------------------------------------------------------------------------------------------------------------------------------------------|
|                                                  |                       |                                                                                                |                |                       |                                                                                                                                                          |                                                                                                                                                                                                                                             |                                                                                                                                                             | 3- comparative                                                                                                                                                                                                       |
| Heil <i>et al.</i> ,<br>2011 <sup>55</sup>       | Prospective<br>cohort | Breast-conserving surgery                                                                      | 135            | Secondary             | Breast<br>Cancer<br>Treatment<br>Outcomes<br>Scale<br>(BCTOS),<br>subscale:<br>breast<br>specific<br>pain,<br>validated <sup>56</sup> ,<br><sup>57</sup> | "Please rate breast sensitivity on this four-point scale, according to your evaluation at this point in time. (Note: If you have had bilateral surgery, complete the items with regard to the difference between the right and left side.)" | 4-point Likert scale from "no difference between treated and untreated breast and area" to "large difference between treated and untreated breast and area" | 1- breast<br>2- sensation<br>3- comparative                                                                                                                                                                          |
| Hetter <i>et al.</i> ,<br>1979 <sup>58</sup>     | Cross-<br>sectional   | Augmentation mammoplasty                                                                       | 221            | Secondary             | <i>Ad hoc</i> <sup>58</sup>                                                                                                                              | <ol style="list-style-type: none"> <li>1. "Did the operation affect your nipple sensation?"</li> <li>2. "Is the change in nipple sensation bothersome to you?"</li> <li>3. "Are there other areas of numbness?"</li> </ol>                  | yes/no                                                                                                                                                      | <ol style="list-style-type: none"> <li>1. 1- nipple<br/>2- sensation<br/>3- comparative</li> <li>2. 1- nipple<br/>2- sensation<br/>3- satisf/import</li> <li>3. 1- breast<br/>2- numbness<br/>3- absolute</li> </ol> |
| Hintringer <i>et al.</i> ,<br>1994 <sup>59</sup> | Cross-<br>sectional   | Reduction mammoplasty/<br>mastopexy                                                            | 199            | Secondary             | <i>Ad hoc</i> <sup>59</sup>                                                                                                                              | "How is the sensitivity in the breast area after the operation?"                                                                                                                                                                            | same/worse/<br>different/better                                                                                                                             | 1- breast<br>2- sensation<br>3- comparative                                                                                                                                                                          |
| Hyckel <i>et al.</i> ,<br>2001 <sup>60</sup>     | Cross-<br>sectional   | Reduction mammoplasty/<br>mastopexy                                                            | 376            | Secondary             | <i>Ad hoc</i> <sup>60</sup>                                                                                                                              | "Postoperative sensibility of the nipple"                                                                                                                                                                                                   | same/better/worse/<br>don't know                                                                                                                            | 1- nipple<br>2- sensation<br>3- comparative                                                                                                                                                                          |
| Hyza <i>et al.</i> ,<br>2015 <sup>61</sup>       | Cross-<br>sectional   | Skin-sparing mastectomy +<br>reconstruction with<br>autologous flap + nipple<br>reconstruction | 17             | Secondary             | <i>Ad hoc</i> <sup>61</sup>                                                                                                                              | "Are you satisfied with the sensitivity of the nipples?"                                                                                                                                                                                    | 10-point scale from<br>"unsatisfied" to<br>"very satisfied"                                                                                                 | 1- nipple<br>2- sensation<br>3- satisf/import                                                                                                                                                                        |
| Isenberg <i>et al.</i> ,<br>2002 <sup>62</sup>   | Prospective<br>cohort | Skin-sparing mastectomy +<br>reconstruction with<br>(innervated) autologous flap               | 10             | Primary               | <i>Ad hoc</i> <sup>62</sup>                                                                                                                              | <ol style="list-style-type: none"> <li>1. "Return of sensation to the reconstructed breast"</li> <li>2. "Return of erogenous sensation to the reconstructed breast"</li> </ol>                                                              | yes/no                                                                                                                                                      | <ol style="list-style-type: none"> <li>1. 1- breast<br/>2- sensation<br/>3- comparative</li> <li>2. 1- breast<br/>2- erogenous</li> </ol>                                                                            |

**Table 1** (continued)

| Study (n = 135)                             | Study design    | Surgery type                                                                                                                     | N <sup>a</sup> | Sensation endpoint | Survey (n = 124)            | Sensation items (n = 215)                                                                                                                                                                                                                                                                                 | Response options                                                         | Item content <sup>b</sup>                                                                                                                                                                                                                                          |
|---------------------------------------------|-----------------|----------------------------------------------------------------------------------------------------------------------------------|----------------|--------------------|-----------------------------|-----------------------------------------------------------------------------------------------------------------------------------------------------------------------------------------------------------------------------------------------------------------------------------------------------------|--------------------------------------------------------------------------|--------------------------------------------------------------------------------------------------------------------------------------------------------------------------------------------------------------------------------------------------------------------|
| Jahkola <i>et al.</i> , 1998 <sup>63</sup>  | Cross-sectional | Breast-conserving surgery/ modified radical mastectomy                                                                           | 163            | Secondary          | <i>Ad hoc</i> <sup>63</sup> | <ol style="list-style-type: none"> <li>1. "Compared with the untreated breast, how is your breast pleasure sensation?"</li> <li>2. "Compared with the untreated breast, how is your nipple pleasure sensation?"</li> <li>3. "Compared with the untreated nipple, how is your nipple erection?"</li> </ol> | more than/ same/less than                                                | <ol style="list-style-type: none"> <li>3- comparative</li> <li>1- breast</li> <li>2- erogenous</li> <li>3- comparative</li> <li>2- nipple</li> <li>2- erogenous</li> <li>3- comparative</li> <li>3- nipple</li> <li>2- erection</li> <li>3- comparative</li> </ol> |
| Jalini <i>et al.</i> , 2017 <sup>64</sup>   | Cross-sectional | Mastectomy + reconstruction:<br>1. autologous flap<br>2. latissimus dorsi flap + implant + nipple reconstruction                 | 32             | Secondary          | <i>Ad hoc</i> <sup>64</sup> | "Satisfaction with sensation of the reconstructed nipple"                                                                                                                                                                                                                                                 | 10-point VAS                                                             | <ol style="list-style-type: none"> <li>1- nipple</li> <li>2- sensation</li> <li>3- satisf/import</li> </ol>                                                                                                                                                        |
| Jin <i>et al.</i> , 2013 <sup>65</sup>      | Cross-sectional | Nipple reduction                                                                                                                 | 257            | Secondary          | <i>Ad hoc</i> <sup>65</sup> | "Was there a change in nipple sensation after the surgery compared to the preoperative state?"                                                                                                                                                                                                            | 4-point Likert scale from "complete absence" to "no change in sensation" | <ol style="list-style-type: none"> <li>1- nipple</li> <li>2- sensation</li> <li>3- comparative</li> </ol>                                                                                                                                                          |
| Kalaaji <i>et al.</i> , 2013 <sup>66</sup>  | Cross-sectional | Augmentation mammoplasty                                                                                                         | 121            | Secondary          | <i>Ad hoc</i> <sup>66</sup> | "To what degree are you satisfied with sensation of the skin of the breast after operation?"                                                                                                                                                                                                              | unsatisfied/no opinion/satisfied                                         | <ol style="list-style-type: none"> <li>1- breast</li> <li>2- sensation</li> <li>3- satisf/import</li> </ol>                                                                                                                                                        |
| Kaminsky <i>et al.</i> , 2015 <sup>67</sup> | Cross-sectional | Breast-conserving surgery/ Skin-sparing mastectomy + (expander-)implant-based reconstruction                                     | 10             | Secondary          | <i>Ad hoc</i> <sup>67</sup> | "Rate your nipple sensation:"                                                                                                                                                                                                                                                                             | 5-point Likert scale from "none" to "same as pre-surgery"                | <ol style="list-style-type: none"> <li>1- nipple</li> <li>2- sensation</li> <li>3- comparative</li> </ol>                                                                                                                                                          |
| Khan <i>et al.</i> , 2016 <sup>68</sup>     | Cross-sectional | Skin-sparing mastectomy/ nipple-sparing mastectomy + reconstruction:<br>1. autologous flap<br>2. latissimus dorsi flap + implant | 94             | Primary            | <i>Ad hoc</i> <sup>68</sup> | <ol style="list-style-type: none"> <li>1. "Do you have any numbness or tingling in your reconstructed breast?"</li> <li>2. "Do you have any loss of pleasurable sensation in your reconstructed breast?"</li> </ol>                                                                                       | 4-point Likert scale from "not at all" to "very much"                    | <ol style="list-style-type: none"> <li>1. 1- breast</li> <li>2- numbness</li> <li>3- absolute</li> <li>2. 1- breast</li> <li>2- erogenous</li> <li>3- absolute</li> </ol>                                                                                          |

**Table 1** (continued)

| Study (n = 135)                                | Study design       | Surgery type                                                                                 | N <sup>a</sup> | Sensation endpoint | Survey (n = 124)                            | Sensation items (n = 215)                                                                                                                                                                                                                                                                                                                                                                                                                                                                                                  | Response options                                                                                                                                                                       | Item content <sup>b</sup>                                                                                                                                                                                                                                                                                                                                                 |
|------------------------------------------------|--------------------|----------------------------------------------------------------------------------------------|----------------|--------------------|---------------------------------------------|----------------------------------------------------------------------------------------------------------------------------------------------------------------------------------------------------------------------------------------------------------------------------------------------------------------------------------------------------------------------------------------------------------------------------------------------------------------------------------------------------------------------------|----------------------------------------------------------------------------------------------------------------------------------------------------------------------------------------|---------------------------------------------------------------------------------------------------------------------------------------------------------------------------------------------------------------------------------------------------------------------------------------------------------------------------------------------------------------------------|
| Kim <i>et al.</i> , 2019 <sup>69</sup>         | Cross-sectional    | Skin-sparing mastectomy/ nipple-sparing mastectomy + (expander-)implant-based reconstruction | 140            | Secondary          | <i>Ad hoc</i> <sup>69</sup>                 | <ol style="list-style-type: none"> <li>1. "Touching the nipple-areola complex is:"</li> <li>2. "Compared to before the operation, change of nipple reaction to cold or touch is:"</li> </ol>                                                                                                                                                                                                                                                                                                                               | <ol style="list-style-type: none"> <li>1. 5-point Likert scale from "very unpleasant" to "very pleasant"</li> <li>2. 5-point Likert scale from "no reaction" to "unchanged"</li> </ol> | <ol style="list-style-type: none"> <li>1. 1- nipple</li> <li>2- erogenous</li> <li>3- absolute</li> <li>2. 1- nipple</li> <li>2- erection</li> <li>3- comparative</li> </ol>                                                                                                                                                                                              |
| Kompatscher <i>et al.</i> , 2004 <sup>70</sup> | Cross-sectional    | Augmentation mammoplasty                                                                     | 18             | Secondary          | <i>Ad hoc</i> <sup>70</sup>                 | "Has sensation returned to normal?"                                                                                                                                                                                                                                                                                                                                                                                                                                                                                        | yes/no                                                                                                                                                                                 | <ol style="list-style-type: none"> <li>1- breast</li> <li>2- sensation</li> <li>3- comparative</li> </ol>                                                                                                                                                                                                                                                                 |
| Lagergren <i>et al.</i> , 2007 <sup>71</sup>   | Cross-sectional    | Skin-sparing mastectomy + (expander-)implant-based reconstruction                            | 14             | Primary            | <i>Ad hoc</i> <sup>71,72</sup>              | <ol style="list-style-type: none"> <li>1. "Do you experience any kind of sensibility in your reconstructed breast when touching it, taking a shower, etc.?"</li> <li>2. "Can you feel pain in your reconstructed breast?"</li> <li>3. "Can you feel touch in your reconstructed breast?"</li> <li>4. "Can you feel temperature (warmth, cold) in your reconstructed breast?"</li> <li>5. "Do you experience the sensibility in your reconstructed breast as weaker or stronger compared with the other breast?"</li> </ol> | <ol style="list-style-type: none"> <li>1. - 4. yes/no</li> <li>5. weaker/stronger</li> </ol>                                                                                           | <ol style="list-style-type: none"> <li>1. 1- breast</li> <li>2- sensation</li> <li>3- absolute</li> <li>2. 1- breast</li> <li>2- pain</li> <li>3- absolute</li> <li>3. 1- breast</li> <li>2- touch</li> <li>3- absolute</li> <li>4. 1- breast</li> <li>2- temperature</li> <li>3- absolute</li> <li>5. 1- breast</li> <li>2- sensation</li> <li>3- comparative</li> </ol> |
| Lagergren <i>et al.</i> , 2010 <sup>72</sup>   | Cross-sectional    | Skin-sparing mastectomy + (expander-)implant-based reconstruction                            | 24             | Primary            |                                             |                                                                                                                                                                                                                                                                                                                                                                                                                                                                                                                            |                                                                                                                                                                                        |                                                                                                                                                                                                                                                                                                                                                                           |
| Lee, C. N. <i>et al.</i> , 2018 <sup>73</sup>  | Prospective cohort | Skin-sparing mastectomy + reconstruction:<br>1. (expander-)implant<br>2. autologous flap     | 96             | Secondary          | <i>Ad hoc</i> <sup>73</sup>                 | "How often do you currently experience numbness in your chest area or arms?"                                                                                                                                                                                                                                                                                                                                                                                                                                               | 5-point Likert scale from "none of the time" to "all of the time"                                                                                                                      | <ol style="list-style-type: none"> <li>1- breast</li> <li>2- numbness</li> <li>3- absolute</li> </ol>                                                                                                                                                                                                                                                                     |
| Lee, T. J. <i>et al.</i> , 2012 <sup>74</sup>  | Cross-sectional    | Skin-sparing mastectomy + reconstruction with autologous flap + nipple reconstruction        | 35             | Secondary          | Survey by Spear <i>et al.</i> <sup>75</sup> | See Spear <i>et al.</i>                                                                                                                                                                                                                                                                                                                                                                                                                                                                                                    | See below                                                                                                                                                                              | See below                                                                                                                                                                                                                                                                                                                                                                 |

**Table 1** (continued)

| Study (n = 135)                              | Study design    | Surgery type                                                                                                                       | N <sup>a</sup> | Sensation endpoint | Survey (n = 124)               | Sensation items (n = 215)                                                                             | Response options                                                  | Item content <sup>b</sup>                                                                     |
|----------------------------------------------|-----------------|------------------------------------------------------------------------------------------------------------------------------------|----------------|--------------------|--------------------------------|-------------------------------------------------------------------------------------------------------|-------------------------------------------------------------------|-----------------------------------------------------------------------------------------------|
| Liew <i>et al.</i> , 1996 <sup>76</sup>      | Cross-sectional | Mastectomy + reconstruction with autologous flap                                                                                   | 21             | Primary            | <i>Ad hoc</i> <sup>76</sup>    | 1. "Is there any sensation in the reconstructed breast?"<br>2. "Is the sensory recovery progressive?" | yes/no                                                            | 1. 1- breast<br>2- sensation<br>3- absolute<br>2. 1- breast<br>2- sensation<br>3- comparative |
| Losken <i>et al.</i> , 2001 <sup>77</sup>    | Cross-sectional | Mastectomy + reconstruction with autologous flap + nipple reconstruction                                                           | 11             | Secondary          | <i>Ad hoc</i> <sup>77</sup>    | "Satisfaction with sensation of the reconstructed nipple"                                             | 101-point VAS                                                     | 1- nipple<br>2- sensation<br>3- satisf/import                                                 |
| Lossing <i>et al.</i> , 1998 <sup>78</sup>   | Cross-sectional | Mastectomy + reconstruction with autologous flap + nipple reconstruction                                                           | 21             | Secondary          | <i>Ad hoc</i> <sup>78</sup>    | "Do you have sensation in your areola?"                                                               | yes/no                                                            | 1- nipple<br>2- sensation<br>3- absolute                                                      |
| Magarakis <i>et al.</i> , 2013 <sup>79</sup> | Cross-sectional | Breast-conserving surgery/ nipple-sparing mastectomy + reconstruction:<br>1. (expander-)implant<br>2. (innervated) autologous flap | 37             | Primary            | <i>Ad hoc</i> <sup>79</sup>    | "Do you feel erotic sensation in your reconstructed breast?"                                          | 5-point Likert scale from "strongly disagree" to "strongly agree" | 1- breast<br>2- erogenous<br>3- absolute                                                      |
| Makboul <i>et al.</i> , 2016 <sup>80</sup>   | Cross-sectional | Reduction mammoplasty/ mastopexy                                                                                                   | 60             | Secondary          | <i>Ad hoc</i> <sup>80,81</sup> | "Nipple sensation"                                                                                    | normal/decreased/lost                                             | 1- nipple<br>2- sensation<br>3- comparative                                                   |
| Makboul <i>et al.</i> , 2017 <sup>81</sup>   | Cross-sectional | Reduction mammoplasty/ mastopexy                                                                                                   | 60             | Secondary          |                                |                                                                                                       |                                                                   |                                                                                               |
| Marconi <i>et al.</i> , 1993 <sup>82</sup>   | Cross-sectional | Reduction mammoplasty/ mastopexy                                                                                                   | 25             | Secondary          | <i>Ad hoc</i> <sup>82</sup>    | "Nipple-areola complex sensitivity"                                                                   | unchanged/ increased/ decreased                                   | 1- nipple<br>2- sensation<br>3- comparative                                                   |
| McCulley <i>et al.</i> , 1999 <sup>83</sup>  | Cross-sectional | Reduction mammoplasty/ mastopexy                                                                                                   | 90             | Secondary          | <i>Ad hoc</i> <sup>83</sup>    | "Feeling in nipples since surgery"                                                                    | normal/present but abnormal/absent                                | 1- nipple<br>2- sensation<br>3- comparative                                                   |
| Mertz <i>et al.</i> , 2017 <sup>84</sup>     | Cross-sectional | Breast-conserving surgery/ mastectomy + (expander-) implant-based reconstruction                                                   | 574            | Secondary          | Breast Cancer Sequelae Cause   | "Have you had numbness or decreased sensitivity in or around the area of your surgery?"               | yes/no                                                            | 1- breast<br>2- numbness<br>3- absolute                                                       |

**Table 1** (continued)

| Study<br>( <i>n</i> = 135)                    | Study<br>design | Surgery type                                                                                  | <i>N</i> <sup>a</sup> | Sensation<br>endpoint | Survey<br>( <i>n</i> = 124) | Sensation items<br>( <i>n</i> = 215)                                                                                                                                              | Response options                                                                             | Item content <sup>b</sup>                                                                                   |
|-----------------------------------------------|-----------------|-----------------------------------------------------------------------------------------------|-----------------------|-----------------------|-----------------------------|-----------------------------------------------------------------------------------------------------------------------------------------------------------------------------------|----------------------------------------------------------------------------------------------|-------------------------------------------------------------------------------------------------------------|
|                                               |                 |                                                                                               |                       |                       |                             | Scales, subscale: sensory disturbances, validated <sup>85</sup>                                                                                                                   |                                                                                              |                                                                                                             |
| Minkowitz <i>et al.</i> , 2012 <sup>86</sup>  | Cross-sectional | Augmentation mammoplasty                                                                      | 94                    | Secondary             | <i>Ad hoc</i> <sup>86</sup> | "Do you experience numbness in the breast?"                                                                                                                                       | yes/no                                                                                       | 1- breast<br>2- numbness<br>3- absolute                                                                     |
| Mizgala <i>et al.</i> , 2000 <sup>87</sup>    | Cross-sectional | Reduction mammoplasty/<br>mastopexy                                                           | 73                    | Secondary             | <i>Ad hoc</i> <sup>87</sup> | "Effect of breast reduction surgery on nipple sensation"                                                                                                                          | more sensitivity/<br>no change/less<br>sensitivity/pressure<br>only/no sensitivity           | 1- nipple<br>2- sensation<br>3- comparative                                                                 |
| Modaffari <i>et al.</i> , 2019 <sup>88</sup>  | Cross-sectional | Skin-sparing mastectomy +<br>(expander-)implant-based<br>reconstruction                       | 208                   | Secondary             | <i>Ad hoc</i> <sup>88</sup> | "How much are you satisfied with the nipple-areola complex tactile sensation?"                                                                                                    | 10-point VAS                                                                                 | 1- nipple<br>2- touch<br>3- satisf/import                                                                   |
| Moscona <i>et al.</i> , 2006 <sup>89</sup>    | Cross-sectional | Mastectomy +<br>reconstruction with<br>autologous flap                                        | 101                   | Secondary             | <i>Ad hoc</i> <sup>89</sup> | "Touch sensation of the breast"                                                                                                                                                   | 5-point Likert scale<br>from "not natural"<br>to "natural"                                   | 1- breast<br>2- touch<br>3- absolute                                                                        |
| Müller <i>et al.</i> , 1974 <sup>90</sup>     | Cross-sectional | Reduction mammoplasty/<br>mastopexy                                                           | 100                   | Secondary             | <i>Ad hoc</i> <sup>90</sup> | "Sensitivity in nipples"                                                                                                                                                          | satisfactory beyond<br>any doubt/<br>not satisfactory/<br>improved/<br>unchanged             | 1- nipple<br>2- sensation<br>3- satisf/import                                                               |
| Nahabedian <i>et al.</i> , 2006 <sup>91</sup> | Cross-sectional | Nipple-sparing mastectomy<br>+ reconstruction:<br>1. (expander-)implant<br>2. autologous flap | 12                    | Secondary             | <i>Ad hoc</i> <sup>91</sup> | <b>1.</b> "Is sensation of the nipple-areola complex present or absent?"<br><b>2.</b> "Is the sensation of the nipple-areola complex the same or different as before mastectomy?" | <b>1.</b> present/absent<br><b>2.</b> same/different                                         | <b>1.</b> 1- nipple<br>2- sensation<br>3- absolute<br><b>2.</b> 1- nipple<br>2- sensation<br>3- comparative |
| Negosanti <i>et al.</i> , 2010 <sup>92</sup>  | Cross-sectional | Skin-sparing mastectomy +<br>reconstruction with<br>autologous flap                           | 20                    | Secondary             | <i>Ad hoc</i> <sup>92</sup> | <b>1.</b> "Please define your level of sensitivity in the reconstructed breast and in the abdominal region."                                                                      | <b>1.</b> 5-point Likert scale from "very poor" to "very good"<br><b>2. + 4. + 6.</b> yes/no | <b>1.</b> 1- breast<br>2- sensation<br>3- absolute<br><b>2.</b> 1- breast<br>2- touch                       |

**Table 1** (continued)

| Study (n = 135)                              | Study design                | Surgery type                    | N <sup>a</sup> | Sensation endpoint | Survey (n = 124)            | Sensation items (n = 215)                                                                                                                                                                                                                                                                                                                                                                                                                                                                                      | Response options                                                                                                                                                     | Item content <sup>b</sup>                                                                                                                                                                                                                                                                                                                                                                                                                                                                                                                       |
|----------------------------------------------|-----------------------------|---------------------------------|----------------|--------------------|-----------------------------|----------------------------------------------------------------------------------------------------------------------------------------------------------------------------------------------------------------------------------------------------------------------------------------------------------------------------------------------------------------------------------------------------------------------------------------------------------------------------------------------------------------|----------------------------------------------------------------------------------------------------------------------------------------------------------------------|-------------------------------------------------------------------------------------------------------------------------------------------------------------------------------------------------------------------------------------------------------------------------------------------------------------------------------------------------------------------------------------------------------------------------------------------------------------------------------------------------------------------------------------------------|
|                                              |                             |                                 |                |                    |                             | <p><b>2.</b> "Did you recover any tactile sensitivity?"</p> <p><b>3.</b> "If the answer to 2. is yes, how long after surgery did you recover tactile sensitivity?"</p> <p><b>4.</b> "Did you recover any thermal sensitivity?"</p> <p><b>5.</b> "If the answer to 4. is yes, how long after surgery did you recover thermal sensitivity?"</p> <p><b>6.</b> "Did you recover any pain sensitivity?"</p> <p><b>7.</b> "If the answer to 6. is yes, how long after surgery did you recover pain sensitivity?"</p> | <p><b>3. + 5. + 7.</b><br/>                     &lt; 3 months/<br/>                     3-6 months/ 6-9 months/ 9-12 months / &gt;12 months</p>                      | <p>3- absolute</p> <p><b>3.</b> 1- breast<br/>                     2- touch<br/>                     3- comparative</p> <p><b>4.</b> 1- breast<br/>                     2- temperature<br/>                     3- absolute</p> <p><b>5.</b> 1- breast<br/>                     2- temperature<br/>                     3- comparative</p> <p><b>6.</b> 1- breast<br/>                     2- pain<br/>                     3- absolute</p> <p><b>7.</b> 1- breast<br/>                     2- pain<br/>                     3- comparative</p> |
| Nguyen <i>et al.</i> , 2013 <sup>93</sup>    | Cross-sectional             | Reduction mammoplasty/mastopexy | 203            | Secondary          | <i>Ad hoc</i> <sup>93</sup> | "Decreased nipple sensitivity resulting from the operation"                                                                                                                                                                                                                                                                                                                                                                                                                                                    | yes/no                                                                                                                                                               | <p>1- nipple</p> <p>2- sensation</p> <p>3- comparative</p>                                                                                                                                                                                                                                                                                                                                                                                                                                                                                      |
| Niechajev <i>et al.</i> , 2007 <sup>94</sup> | Randomized controlled trial | Augmentation mammoplasty        | 80             | Secondary          | <i>Ad hoc</i> <sup>94</sup> | <p><b>1.</b> "Breast skin sensitivity"</p> <p><b>2.</b> "Nipple sensitivity"</p>                                                                                                                                                                                                                                                                                                                                                                                                                               | normal/increase/slight loss/severe loss/no sensitivity                                                                                                               | <p><b>1.</b> 1- breast<br/>                     2- sensation<br/>                     3- comparative</p> <p><b>2.</b> 1- nipple<br/>                     2- sensation<br/>                     3- comparative</p>                                                                                                                                                                                                                                                                                                                               |
| Okwueze <i>et al.</i> , 2006 <sup>95</sup>   | Cross-sectional             | Augmentation mammoplasty        | 33             | Primary            | <i>Ad hoc</i> <sup>95</sup> | <p><b>1.</b> "Did surgery affect nipple/breast sensation?"</p> <p><b>2.</b> "Did nipple/breast sensation improve with time?"</p> <p><b>3.</b> "Was change in sensation bothersome?"</p> <p><b>4.</b> "Description of change in sensation"</p> <p><b>5.</b> "Change in sensation first noticed"</p>                                                                                                                                                                                                             | <p><b>1. – 3.</b> yes/no/don't know</p> <p><b>4.</b> decreased/increased/painful/cannot explain</p> <p><b>5.</b> soon after surgery/first month of surgery/later</p> | <p><b>1.</b> 1- breast<br/>                     2- sensation<br/>                     3- comparative</p> <p><b>2.</b> 1- breast<br/>                     2- sensation<br/>                     3- comparative</p> <p><b>3.</b> 1- breast<br/>                     2- sensation<br/>                     3- satisf/import</p> <p><b>4.</b> 1- breast<br/>                     2- sensation<br/>                     3- comparative</p> <p><b>5.</b> 1- breast<br/>                     2- sensation</p>                                          |

**Table 1** (continued)

| Study (n = 135)                              | Study design       | Surgery type                                                                                                                              | N <sup>a</sup> | Sensation endpoint | Survey (n = 124)               | Sensation items (n = 215)                                                             | Response options                                                  | Item content <sup>b</sup>                                                                            |
|----------------------------------------------|--------------------|-------------------------------------------------------------------------------------------------------------------------------------------|----------------|--------------------|--------------------------------|---------------------------------------------------------------------------------------|-------------------------------------------------------------------|------------------------------------------------------------------------------------------------------|
|                                              |                    |                                                                                                                                           |                |                    |                                |                                                                                       |                                                                   | 3- comparative                                                                                       |
| Osinga <i>et al.</i> , 2014 <sup>96</sup>    | Cross-sectional    | Reduction mammoplasty/ mastopexy, augmentation mammoplasty                                                                                | 64             | Secondary          | <i>Ad hoc</i> <sup>96,97</sup> | "How happy are you with your breast sensibility and how would you rate it from 1-10?" | 10-point VAS: 1=worst, 10=best                                    | 1- breast                                                                                            |
| Osinga <i>et al.</i> , 2017 <sup>97</sup>    | Cross-sectional    | Reduction mammoplasty/ mastopexy                                                                                                          | 259            | Secondary          |                                |                                                                                       |                                                                   | 2- sensation                                                                                         |
|                                              |                    |                                                                                                                                           |                |                    |                                |                                                                                       |                                                                   | 3- satisf/import                                                                                     |
| Otterburn <i>et al.</i> , 2010 <sup>98</sup> | Cross-sectional    | Mastectomy + reconstruction:<br>1. (expander-)implant<br>2. autologous flap<br>3. latissimus dorsi flap + implant + nipple reconstruction | 199            | Secondary          | <i>Ad hoc</i> <sup>98</sup>    | 1. "Satisfaction with breast sensation"<br>2. "Satisfaction with nipple sensation"    | 5-point Likert scale from "most satisfied" to "not satisfied"     | 1. 1- breast<br>2- sensation<br>3- satisf/import<br>2. 1- nipple<br>2- sensation<br>3- satisf/import |
| Ou <i>et al.</i> , 2015 <sup>99</sup>        | Cross-sectional    | Nipple-sparing mastectomy + reconstruction:<br>1. (expander-)implant<br>2. autologous flap                                                | 42             | Secondary          | <i>Ad hoc</i> <sup>99</sup>    | 1. "Sensation of the nipple"<br>2. "Nipple arousal"                                   | 4-point Likert scale from "poor" to "excellent"                   | 1. 1- nipple<br>2- sensation<br>3- absolute<br>2. 1- nipple<br>2- erogenous<br>3- absolute           |
| Pan <i>et al.</i> , 2019 <sup>100</sup>      | Cross-sectional    | Nipple-sparing mastectomy + (expander-)implant-based reconstruction                                                                       | 41             | Secondary          | <i>Ad hoc</i> <sup>100</sup>   | "Sensation in the nipple-areola complex"                                              | 4-point Likert scale from "no sensation" to "good sensation"      | 1- nipple<br>2- sensation<br>3- absolute                                                             |
| Pek <i>et al.</i> , 2019 <sup>101</sup>      | Cross-sectional    | Nipple-sparing mastectomy + reconstruction:<br>1. (expander-)implant<br>2. autologous flap<br>3. latissimus dorsi flap + implant          | 133            | Secondary          | <i>Ad hoc</i> <sup>101</sup>   | 1. "Sensation of the nipple-areola complex"<br>2. "Nipple-areola complex arousal"     | 4-point Likert scale from "poor" to "excellent"                   | 1. 1- nipple<br>2- sensation<br>3- absolute<br>2. 1- nipple<br>2- erogenous<br>3- absolute           |
| Peled <i>et al.</i> , 2014 <sup>102</sup>    | Prospective cohort | Skin-sparing mastectomy + (expander-)implant-based reconstruction                                                                         | 51             | Secondary          | <i>Ad hoc</i> <sup>102</sup>   | "Sensation of the nipple-areola complex"                                              | 4-point Likert scale from "very dissatisfied" to "very satisfied" | 1- nipple<br>2- sensation<br>3- satisf/import                                                        |



**Table 1** (continued)

| Study<br>(n = 135)                                | Study<br>design | Surgery type                                                                               | N <sup>a</sup> | Sensation<br>endpoint | Survey<br>(n = 124)              | Sensation items<br>(n = 215)                                                             | Response options                                                                                                                                                                                   | Item content <sup>b</sup>                                                                  |
|---------------------------------------------------|-----------------|--------------------------------------------------------------------------------------------|----------------|-----------------------|----------------------------------|------------------------------------------------------------------------------------------|----------------------------------------------------------------------------------------------------------------------------------------------------------------------------------------------------|--------------------------------------------------------------------------------------------|
| Peters <i>et al.</i> ,<br>1997 <sup>103</sup>     | Cross-sectional | Breast implant removal                                                                     | 100            | Secondary             | <i>Ad hoc</i> <sup>103</sup>     | 1. "Loss of nipple sensitivity"<br>2. "Loss of sensitivity in other areas of the breast" | 1. 11-point Likert scale from "none" to "numb"<br>2. almost the complete breast/inframammary area/lateral portion/area around the nipple/medial portion of the breast/medial area of the upper arm | 1. 1- nipple<br>2- sensation<br>3- absolute<br>2. 1- breast<br>2- sensation<br>3- absolute |
| Petit <i>et al.</i> ,<br>2005 <sup>104</sup>      | Cross-sectional | Nipple-sparing mastectomy + reconstruction:<br>1. (expander-)implant<br>2. autologous flap | 289            | Secondary             | <i>Ad hoc</i> <sup>104,105</sup> | "Sensitivity of the nipple-areola complex"                                               | 10-point VAS                                                                                                                                                                                       | 1- nipple<br>2- sensation<br>3- absolute                                                   |
| Petit <i>et al.</i> ,<br>2006 <sup>105</sup>      | Cross-sectional | Nipple-sparing mastectomy + reconstruction:<br>1. (expander-)implant<br>2. autologous flap | 102            | Secondary             |                                  |                                                                                          |                                                                                                                                                                                                    |                                                                                            |
| Pickford <i>et al.</i> ,<br>1993 <sup>106</sup>   | Cross-sectional | Reduction mammoplasty/mastopexy                                                            | 25             | Secondary             | <i>Ad hoc</i> <sup>106</sup>     | "Nipple-areola sensation"                                                                | unchanged/<br>present/diminished/<br>absent                                                                                                                                                        | 1- nipple<br>2- sensation<br>3- comparative                                                |
| Przybilski <i>et al.</i> ,<br>1981 <sup>107</sup> | Cross-sectional | Reduction mammoplasty/mastopexy                                                            | 685            | Secondary             | <i>Ad hoc</i> <sup>107</sup>     | "Sensitivity of the nipple-areola complex"                                               | like before the operation/<br>less than before the operation/<br>more than before the operation/none                                                                                               | 1- nipple<br>2- sensation<br>3- comparative                                                |
| Puonti <i>et al.</i> ,<br>2011 <sup>108</sup>     | Cross-sectional | Skin-sparing mastectomy + reconstruction with (innervated) autologous flap                 | 40             | Primary               | <i>Ad hoc</i> <sup>108</sup>     | "Sensation in TRAM flap"                                                                 | 10-point VAS                                                                                                                                                                                       | 1- breast<br>2- sensation<br>3- absolute                                                   |

**Table 1** (continued)

| Study<br>(n = 135)                            | Study design    | Surgery type                                                        | N <sup>a</sup> | Sensation endpoint | Survey<br>(n = 124)          | Sensation items<br>(n = 215)                                                                                                                                                                                                                                                                                                                                 | Response options                                                                                                                                           | Item content <sup>b</sup>                                                                                                                                                                                                                                                                                                    |
|-----------------------------------------------|-----------------|---------------------------------------------------------------------|----------------|--------------------|------------------------------|--------------------------------------------------------------------------------------------------------------------------------------------------------------------------------------------------------------------------------------------------------------------------------------------------------------------------------------------------------------|------------------------------------------------------------------------------------------------------------------------------------------------------------|------------------------------------------------------------------------------------------------------------------------------------------------------------------------------------------------------------------------------------------------------------------------------------------------------------------------------|
| Ren <i>et al.</i> , 2013 <sup>109</sup>       | Cross-sectional | Nipple reduction                                                    | 22             | Secondary          | <i>Ad hoc</i> <sup>109</sup> | "Sensation of the nipple"                                                                                                                                                                                                                                                                                                                                    | 4-point Likert scale from "no change in sensation" to "complete absence"                                                                                   | 1- nipple<br>2- sensation<br>3- comparative                                                                                                                                                                                                                                                                                  |
| Robertson <i>et al.</i> , 2012 <sup>110</sup> | Cross-sectional | Skin-sparing mastectomy + (expander-)implant-based reconstruction   | 223            | Secondary          | <i>Ad hoc</i> <sup>110</sup> | "Sensibility of the breast"                                                                                                                                                                                                                                                                                                                                  | negative/neutral/positive                                                                                                                                  | 1- breast<br>2- sensation<br>3- satisf/import                                                                                                                                                                                                                                                                                |
| Sandsmark <i>et al.</i> , 1992 <sup>111</sup> | Cross-sectional | Reduction mammoplasty/mastopexy                                     | 292            | Secondary          | <i>Ad hoc</i> <sup>111</sup> | <ol style="list-style-type: none"> <li>1. "Tactile sensitivity of the nipple-areola complex"</li> <li>2. "Erogenous sensation of the nipple-areola complex"</li> <li>3. "Sensitivity of the breast to hot and cold"</li> <li>4. "Reduced sensitivity in which part of the breast?"</li> <li>5. "Return of sensation in the nipple-areola complex"</li> </ol> | <ol style="list-style-type: none"> <li>1. - 3. full/reduced/none</li> <li>4. ?</li> <li>5. &lt;1 months/1-3 months/3-6 months/&gt;6 months/none</li> </ol> | <ol style="list-style-type: none"> <li>1. 1- nipple<br/>2- touch<br/>3- absolute</li> <li>2. 1- nipple<br/>2- erogenous<br/>3- absolute</li> <li>3. 1- breast<br/>2- temperature<br/>3- absolute</li> <li>4. 1- breast<br/>2- sensation<br/>3- absolute</li> <li>5. 1- nipple<br/>2- sensation<br/>3- comparative</li> </ol> |
| Schratt <i>et al.</i> , 2014 <sup>112</sup>   | Cross-sectional | Reduction mammoplasty/mastopexy                                     | 33             | Primary            | <i>Ad hoc</i> <sup>112</sup> | "Changed sensation of the breast"                                                                                                                                                                                                                                                                                                                            | yes/no                                                                                                                                                     | 1- breast<br>2- sensation<br>3- comparative                                                                                                                                                                                                                                                                                  |
| Serletti <i>et al.</i> , 1992 <sup>113</sup>  | Cross-sectional | Reduction mammoplasty/mastopexy                                     | 116            | Secondary          | <i>Ad hoc</i> <sup>113</sup> | "Change in nipple sensation after the operation"                                                                                                                                                                                                                                                                                                             | yes/no/no response                                                                                                                                         | 1- nipple<br>2- sensation<br>3- comparative                                                                                                                                                                                                                                                                                  |
| Shaffer <i>et al.</i> , 2019 <sup>114</sup>   | Cross-sectional | Nipple-sparing mastectomy + (expander-)implant-based reconstruction | 91             | Secondary          | <i>Ad hoc</i> <sup>114</sup> | "Degree of residual nipple sensation"                                                                                                                                                                                                                                                                                                                        | 5-point Likert scale from "no sensation" to "normal sensation"                                                                                             | 1- nipple<br>2- sensation<br>3- absolute                                                                                                                                                                                                                                                                                     |

**Table 1** (continued)

| Study (n = 135)                                  | Study design       | Surgery type                                                                | N <sup>a</sup> | Sensation endpoint | Survey (n = 124)             | Sensation items (n = 215)                                                                                                                                                                                                                                                                                                                                                                              | Response options                                                                            | Item content <sup>b</sup>                                                                                                                                                                                                                                     |
|--------------------------------------------------|--------------------|-----------------------------------------------------------------------------|----------------|--------------------|------------------------------|--------------------------------------------------------------------------------------------------------------------------------------------------------------------------------------------------------------------------------------------------------------------------------------------------------------------------------------------------------------------------------------------------------|---------------------------------------------------------------------------------------------|---------------------------------------------------------------------------------------------------------------------------------------------------------------------------------------------------------------------------------------------------------------|
| Shaikh-Naidu <i>et al.</i> , 2004 <sup>115</sup> | Cross-sectional    | Mastectomy + reconstruction:<br>1. (expander-)implant<br>2. autologous flap | 437            | Secondary          | <i>Ad hoc</i> <sup>115</sup> | "Breast sensation"                                                                                                                                                                                                                                                                                                                                                                                     | 5-point Likert scale from "lowest level of satisfaction" to "highest level of satisfaction" | 1- breast<br>2- sensation<br>3- satisf/import                                                                                                                                                                                                                 |
| Shan <i>et al.</i> , 2016 <sup>116</sup>         | Cross-sectional    | Reduction mammoplasty/<br>mastopexy                                         | 46             | Secondary          | <i>Ad hoc</i> <sup>116</sup> | <ol style="list-style-type: none"> <li>"Nipple-areola complex feeling to pain compared to preoperative situation"</li> <li>"Nipple-areola complex feeling to temperature compared to preoperative situation"</li> <li>"Nipple-areola complex feeling to touch compared to preoperative situation"</li> <li>"Sexual feeling of the nipple-areola complex compared to preoperative situation"</li> </ol> | no feeling/serious decline/<br>dysesthesia/same as prior to surgery                         | <ol style="list-style-type: none"> <li>1- nipple<br/>2- pain<br/>3- comparative</li> <li>1- nipple<br/>2- temperature<br/>3- comparative</li> <li>1- nipple<br/>2- touch<br/>3- comparative</li> <li>1- nipple<br/>2- erogenous<br/>3- comparative</li> </ol> |
| Shaw <i>et al.</i> , 1997 <sup>117</sup>         | Cross-sectional    | Mastectomy + reconstruction with autologous flap                            | 29             | Primary            | <i>Ad hoc</i> <sup>117</sup> | <ol style="list-style-type: none"> <li>"I have feeling in the reconstructed breast when it is bumped in daily life."</li> <li>"I have feeling in the reconstructed breast when it is touched."</li> <li>"I have erotic sensation in my reconstructed breast."</li> </ol>                                                                                                                               | 6-point Likert scale from "strong disagreement" to "strong agreement"                       | <ol style="list-style-type: none"> <li>1- breast<br/>2- pressure<br/>3- absolute</li> <li>1- breast<br/>2- touch<br/>3- absolute</li> <li>1- breast<br/>2- erogenous<br/>3- absolute</li> </ol>                                                               |
| Shi <i>et al.</i> , 2015 <sup>118</sup>          | Cross-sectional    | Augmentation mammoplasty                                                    | 144            | Secondary          | <i>Ad hoc</i> <sup>118</sup> | "Nipple-areola complex sensation"                                                                                                                                                                                                                                                                                                                                                                      | 5-point Likert scale from "very dissatisfied" to "very satisfied"                           | 1- nipple<br>2- sensation<br>3- satisf/import                                                                                                                                                                                                                 |
| Shiau <i>et al.</i> , 2011 <sup>119</sup>        | Prospective cohort | Inverted nipple correction                                                  | 17             | Secondary          | <i>Ad hoc</i> <sup>119</sup> | "Has nipple sensation returned?"                                                                                                                                                                                                                                                                                                                                                                       | yes/no                                                                                      | 1- nipple<br>2- sensation<br>3- absolute                                                                                                                                                                                                                      |
| Smoll <i>et al.</i> , 2013 <sup>120</sup>        | Cross-sectional    | Reduction mammoplasty/<br>mastopexy                                         | 270            | Secondary          | <i>Ad hoc</i> <sup>120</sup> | "Nipple sensation"                                                                                                                                                                                                                                                                                                                                                                                     | reduced/normal                                                                              | 1- nipple<br>2- sensation                                                                                                                                                                                                                                     |

**Table 1** (continued)

| Study (n = 135)                                | Study design       | Surgery type                                                                                                     | N <sup>a</sup> | Sensation endpoint | Survey (n = 124)                 | Sensation items (n = 215)                                                                                                                                                                                                                 | Response options                                                                                                                                                                                                                                                                                                             | Item content <sup>b</sup>                                                                                                                                                                                                                   |
|------------------------------------------------|--------------------|------------------------------------------------------------------------------------------------------------------|----------------|--------------------|----------------------------------|-------------------------------------------------------------------------------------------------------------------------------------------------------------------------------------------------------------------------------------------|------------------------------------------------------------------------------------------------------------------------------------------------------------------------------------------------------------------------------------------------------------------------------------------------------------------------------|---------------------------------------------------------------------------------------------------------------------------------------------------------------------------------------------------------------------------------------------|
|                                                |                    |                                                                                                                  |                |                    |                                  |                                                                                                                                                                                                                                           |                                                                                                                                                                                                                                                                                                                              | 3- absolute                                                                                                                                                                                                                                 |
| Spear <i>et al.</i> , 2011 <sup>75</sup>       | Cross-sectional    | Skin-sparing mastectomy + reconstruction:<br>1. (expander-)implant<br>2. autologous flap + nipple reconstruction | 59             | Secondary          | <i>Ad hoc</i> <sup>75</sup>      | <ol style="list-style-type: none"> <li>1. "How is the sensation in your donor nipple?"</li> <li>2. "How is the contractility of your donor nipple?"</li> <li>3. "Has the role of your donor nipple in sexual arousal changed?"</li> </ol> | <ol style="list-style-type: none"> <li>1. 4-point Likert scale from "totally numb" to "sensation unchanged from before surgery"</li> <li>2. 4-point Likert scale from "never contracts" to "contracts with normal stimulation"</li> <li>3. 4-point Likert scale from "greatly decreased role" to "unchanged role"</li> </ol> | <ol style="list-style-type: none"> <li>1. 1- nipple</li> <li>2- sensation</li> <li>3- comparative</li> <li>2. 1- nipple</li> <li>2- erection</li> <li>3- absolute</li> <li>3. 1- nipple</li> <li>2- sensation</li> <li>3- impact</li> </ol> |
| Stokes <i>et al.</i> , 2004 <sup>121</sup>     | Cross-sectional    | Augmentation mammoplasty                                                                                         | 19             | Secondary          | <i>Ad hoc</i> <sup>121</sup>     | "How would you rate the sensation in your breasts compared to how they felt before your surgery"                                                                                                                                          | more sensitive/<br>similar sensation/<br>less sensitive/numb                                                                                                                                                                                                                                                                 | <ol style="list-style-type: none"> <li>1- breast</li> <li>2- sensation</li> <li>3- comparative</li> </ol>                                                                                                                                   |
| Struckmann <i>et al.</i> , 2016 <sup>122</sup> | Cross-sectional    | Mastectomy + reconstruction with autologous flap                                                                 | 142            | Secondary          | <i>Ad hoc</i> <sup>122</sup>     | "Touch sensation of the breast"                                                                                                                                                                                                           | 5-point Likert scale from "none" to "normal"                                                                                                                                                                                                                                                                                 | <ol style="list-style-type: none"> <li>1- breast</li> <li>2- touch</li> <li>3- absolute</li> </ol>                                                                                                                                          |
| Swanson, 2013 <sup>123</sup>                   | Prospective cohort | Reduction mammoplasty/<br>mastopexy, augmentation mammoplasty                                                    | 125            | Secondary          | <i>Ad hoc</i> <sup>123,124</sup> | "Postoperative nipple numbness"                                                                                                                                                                                                           | yes/no                                                                                                                                                                                                                                                                                                                       | <ol style="list-style-type: none"> <li>1- nipple</li> <li>2- numbness</li> <li>3- absolute</li> </ol>                                                                                                                                       |
| Swanson, 2013 <sup>124</sup>                   | Prospective cohort | Augmentation mammoplasty                                                                                         | 281            | Secondary          |                                  |                                                                                                                                                                                                                                           |                                                                                                                                                                                                                                                                                                                              |                                                                                                                                                                                                                                             |
| Swanson, 2016 <sup>125</sup>                   | Cross-sectional    | Augmentation mammoplasty                                                                                         | 100            | Secondary          | <i>Ad hoc</i> <sup>125</sup>     | <ol style="list-style-type: none"> <li>1. "Nipple numbness"</li> <li>2. "Location of numbness"</li> <li>3. "Did feeling of the nipple return?"</li> </ol>                                                                                 | <ol style="list-style-type: none"> <li>1. yes/no</li> <li>2. unilateral/<br/>bilateral</li> <li>3. yes/no/partially</li> </ol>                                                                                                                                                                                               | <ol style="list-style-type: none"> <li>1. 1- nipple</li> <li>2- numbness</li> <li>3- absolute</li> <li>2. 1- nipple</li> <li>2- numbness</li> <li>3- absolute</li> </ol>                                                                    |

**Table 1** (continued)

| Study (n = 135)                                   | Study design                | Surgery type                                                                                 | N <sup>a</sup> | Sensation endpoint | Survey (n = 124)                 | Sensation items (n = 215)                                                                                                                                                                                                                                                                 | Response options                                                                                                                                                                            | Item content <sup>b</sup>                                                                                                                                                                   |
|---------------------------------------------------|-----------------------------|----------------------------------------------------------------------------------------------|----------------|--------------------|----------------------------------|-------------------------------------------------------------------------------------------------------------------------------------------------------------------------------------------------------------------------------------------------------------------------------------------|---------------------------------------------------------------------------------------------------------------------------------------------------------------------------------------------|---------------------------------------------------------------------------------------------------------------------------------------------------------------------------------------------|
|                                                   |                             |                                                                                              |                |                    |                                  |                                                                                                                                                                                                                                                                                           |                                                                                                                                                                                             | 3. 1- nipple<br>2- sensation<br>3- comparative                                                                                                                                              |
| Tairysh <i>et al.</i> , 1998 <sup>126</sup>       | Cross-sectional             | Reduction mammoplasty/mastopexy                                                              | 44             | Secondary          | <i>Ad hoc</i> <sup>126,127</sup> | 1. "Changed sensitivity of the nipple-areola complex"<br>2. "How bothersome is decreased sensitivity?"                                                                                                                                                                                    | 1. unchanged/only temporary impairment/decreased sensitivity<br>2. bothersome/not bothersome                                                                                                | 1. 1- nipple<br>2- sensation<br>3- comparative                                                                                                                                              |
| Tairysh <i>et al.</i> , 2000 <sup>127</sup>       | Cross-sectional             | Reduction mammoplasty/mastopexy                                                              | 403            | Secondary          |                                  |                                                                                                                                                                                                                                                                                           |                                                                                                                                                                                             | 2. 1- nipple<br>2- sensation<br>3- satisf/import                                                                                                                                            |
| Temel <i>et al.</i> , 2015 <sup>128</sup>         | Cross-sectional             | Reduction mammoplasty/mastopexy                                                              | 110            | Secondary          | <i>Ad hoc</i> <sup>128</sup>     | "Sensation of the nipple-areola complex"                                                                                                                                                                                                                                                  | same/worse/better than before the surgery                                                                                                                                                   | 1- nipple<br>2- sensation<br>3- comparative                                                                                                                                                 |
| Thompson <i>et al.</i> , 1990 <sup>129</sup>      | Cross-sectional             | Mastectomy + (expander-) implant-based reconstruction                                        | 29             | Secondary          | <i>Ad hoc</i> <sup>129</sup>     | "Do you have altered chest sensation?"                                                                                                                                                                                                                                                    | yes/no                                                                                                                                                                                      | 1- breast<br>2- sensation<br>3- comparative                                                                                                                                                 |
| Unukovych <i>et al.</i> , 2014 <sup>130</sup>     | Randomized controlled trial | Skin-sparing mastectomy                                                                      | 43             | Secondary          | <i>Ad hoc</i> <sup>130</sup>     | 1. "To what extent is your sensation in the breast area reduced?"<br>2. "To what extent does your reduced sensation affect your wish to touch yourself in the breast area?"                                                                                                               | 4-point Likert scale from "not at all" to "much"                                                                                                                                            | 1. 1- breast<br>2- sensation<br>3- comparative<br>2. 1- breast<br>2- sensation<br>3- impact                                                                                                 |
| Van Verschuer <i>et al.</i> , 2016 <sup>131</sup> | Cross-sectional             | Nipple-sparing mastectomy/skin-sparing mastectomy + (expander-) implant-based reconstruction | 45             | Primary            | <i>Ad hoc</i> <sup>131</sup>     | 1. "Nipple-areola complex sensitivity compared with before the operation"<br>2. "Did sexual pleasure change since the operation because of loss of nipple-areola complex sensitivity?"<br>3. "Touching the nipple-areola complex is:"<br>4. "Change of nipple reaction to cold or touch:" | 1. 5-point Likert scale from "insensitive" to "hypersensitive"<br>2. 5-point Likert scale from "absent" to "unchanged"<br>3. 5-point Likert scale from "very unpleasant" to "very pleasant" | 1. 1- nipple<br>2- sensation<br>3- comparative<br>2. 1- nipple<br>2- erogenous<br>3- impact<br>3. 1- nipple<br>2- erogenous<br>3- absolute<br>4. 1- nipple<br>2- erection<br>3- comparative |

**Table 1** (continued)

| Study<br>(n = 135)                               | Study<br>design | Surgery type                                                        | N <sup>a</sup> | Sensation<br>endpoint | Survey<br>(n = 124)              | Sensation items<br>(n = 215)                                                                                                                                                                                             | Response options                                                                                                   | Item content <sup>b</sup>                                                                                                                                                                                                      |
|--------------------------------------------------|-----------------|---------------------------------------------------------------------|----------------|-----------------------|----------------------------------|--------------------------------------------------------------------------------------------------------------------------------------------------------------------------------------------------------------------------|--------------------------------------------------------------------------------------------------------------------|--------------------------------------------------------------------------------------------------------------------------------------------------------------------------------------------------------------------------------|
|                                                  |                 |                                                                     |                |                       |                                  |                                                                                                                                                                                                                          | 4. 5-point Likert scale from "no reaction" to "unchanged"                                                          |                                                                                                                                                                                                                                |
| Von Sperling <i>et al.</i> , 2011 <sup>132</sup> | Cross-sectional | Reduction mammoplasty/mastopexy                                     | 109            | Secondary             | <i>Ad hoc</i> <sup>133</sup>     | 1. "Decreased sensation"<br>2. "Area of decreased sensation"<br>3. "How bothered are you by sensory changes in your breast?"                                                                                             | 1. yes/no<br>2. ?<br>3. 10-point VAS                                                                               | 1. 1- breast<br>2- sensation<br>3- absolute<br>2. 1- breast<br>2- sensation<br>3- absolute<br>3. 1- breast<br>2- sensation<br>3- satisf/import                                                                                 |
| Von Sperling <i>et al.</i> , 2011 <sup>133</sup> | Cross-sectional | Augmentation mammoplasty                                            | 142            | Secondary             | <i>Ad hoc</i> <sup>132</sup>     | "Decreased sensation"                                                                                                                                                                                                    | yes/no                                                                                                             | 1- breast<br>2- sensation<br>3- absolute                                                                                                                                                                                       |
| Wolter <i>et al.</i> , 2017 <sup>134</sup>       | Cross-sectional | Reduction mammoplasty/mastopexy, augmentation mammoplasty           | 68             | Secondary             | <i>Ad hoc</i> <sup>134,135</sup> | "Breast gland sensitivity"                                                                                                                                                                                               | 4-point Likert scale from "none" to "very good"                                                                    | 1- breast<br>2- sensation<br>3- absolute                                                                                                                                                                                       |
| Wolter <i>et al.</i> , 2017 <sup>135</sup>       | Cross-sectional | Reduction mammoplasty/mastopexy                                     | 174            | Secondary             |                                  |                                                                                                                                                                                                                          |                                                                                                                    |                                                                                                                                                                                                                                |
| Yueh <i>et al.</i> , 2009 <sup>136</sup>         | Cross-sectional | Nipple-sparing mastectomy + (expander-)implant-based reconstruction | 10             | Secondary             | <i>Ad hoc</i> <sup>136</sup>     | "Sensation of the nipple-areola complex:<br>1. ability to detect light touch<br>2. ability to detect pressure<br>3. ability to detect temperature<br>4. ability to detect pain<br>5. projectile responsiveness to touch" | Each of the 5 criteria was evaluated between 0-2 points, and the sum of the scores could range between 0-10 points | 1. 1- nipple<br>2- touch<br>3- absolute<br>2. 1- nipple<br>2- pressure<br>3- absolute<br>3. 1- nipple<br>2- temperature<br>3- absolute<br>4. 1- nipple<br>2- pain<br>3- absolute<br>5. 1- nipple<br>2- erection<br>3- absolute |

**Table 1** (continued)

| Study<br>(n = 135)                         | Study<br>design | Surgery type                                               | N <sup>a</sup> | Sensation<br>endpoint | Survey<br>(n = 124)          | Sensation items<br>(n = 215)                                                                                                                  | Response options                                                         | Item content <sup>b</sup>                                                                                                                                        |
|--------------------------------------------|-----------------|------------------------------------------------------------|----------------|-----------------------|------------------------------|-----------------------------------------------------------------------------------------------------------------------------------------------|--------------------------------------------------------------------------|------------------------------------------------------------------------------------------------------------------------------------------------------------------|
| Zelken <i>et al.</i> , 2016 <sup>137</sup> | Cross-sectional | Augmentation mammoplasty                                   | 11             | Secondary             | <i>Ad hoc</i> <sup>137</sup> | "Nipple sensitivity after the operation"                                                                                                      | more sensitive/<br>no change in<br>sensation                             | 1- nipple<br>2- sensation<br>3- comparative                                                                                                                      |
| Zenn <i>et al.</i> , 2009 <sup>138</sup>   | Cross-sectional | Mastectomy + breast reconstruction + nipple reconstruction | 88             | Secondary             | <i>Ad hoc</i> <sup>138</sup> | <b>1.</b> "Sensation of the nipple"<br><b>2.</b> "Time frame for recovery of nipple sensation"<br><b>3.</b> "Erectile function of the nipple" | <b>1. + 3.</b> 5-point Likert scale from "poor" to "same"<br><b>2.</b> ? | <b>1.</b> 1- nipple<br>2- sensation<br>3- absolute<br><b>2.</b> 1- nipple<br>2- sensation<br>3- comparative<br><b>3.</b> 1- nipple<br>2- erection<br>3- absolute |

<sup>a</sup> Number of patients

<sup>b</sup> 1- Area (nipple, breast)

2- Aspect (sensation, erogenous sensation, touch sensation, numbness, temperature sensation, nipple erection, pain sensation, pressure sensation)

3- Question type (absolute, comparative, satisfaction/importance, impact)

## REFERENCES

- 1 Abozeid, M. F., Tahseen, H. & Kenawi, I. McKissock's reduction mammoplasty revisited: A case series study with 12-months follow-up. *Plast Reconstr Surg Glob Open* 6, e1791, doi:10.1097/GOX.0000000000001791 (2018).
- 2 Ahmed, O. A. & Kolhe, P. S. Comparison of nipple and areolar sensation after breast reduction by free nipple graft and inferior pedicle techniques. *Br J Plast Surg* 53, 126-129, doi:10.1054/bjps.1999.3235 (2000).
- 3 Araco, A., Araco, F., Sorge, R. & Gravante, G. Sensitivity of the nipple-areola complex and areolar pain following aesthetic breast augmentation in a retrospective series of 1200 patients: Periareolar versus submammary incision. *Plast Reconstr Surg* 128, 984-989, doi:10.1097/PRS.0b013e3182268d73 (2011).
- 4 Banbury, J. *et al.* Prospective analysis of the outcome of subpectoral breast augmentation: Sensory changes, muscle function, and body image. *Plast Reconstr Surg* 113, 701-707; discussion 708, doi:10.1097/01.PRS.0000101503.94322.C6 (2004).
- 5 Baron, R. H. *et al.* Patients' sensations after breast cancer surgery. A pilot study. *Cancer Pract* 8, 215-222, doi:10.1046/j.1523-5394.2000.85005.x (2000).
- 6 Baumeister, R. G., Daigeler, R., Umlandt, A. & Bohmert, H. [Late results of McKissock breast reduction-plasty]. *Langenbecks Arch Chir* 369, 285-289, doi:10.1007/BF01274371 (1986).
- 7 Berg, A., Palmer, B. & Stark, B. Early experience with Lejour vertical scar reduction mammoplasty technique. *European Journal of Plastic Surgery* 18, 214-219 (1995).
- 8 Blomqvist, L. & Malm, M. Clinical experience with the lateral thoracodorsal flap in breast reconstruction. *Ann Plast Surg* 43, 7-13, doi:10.1097/0000637-199907000-00002 (1999).
- 9 Blondeel, P. N. *et al.* Sensory nerve repair in perforator flaps for autologous breast reconstruction: Sensational or senseless? *Br J Plast Surg* 52, 37-44, doi:10.1054/bjps.1998.3011 (1999).
- 10 Bodin, F., Bruant-Rodier, C., Lutz, J. C., Himy, S. & Wilk, A. [Reconstruction of the nipple-areolar complex: Long-term results]. *Ann Chir Plast Esthet* 53, 334-341, doi:10.1016/j.anplas.2007.06.004 (2008).
- 11 Brandberg, Y. *et al.* Less correspondence between expectations before and cosmetic results after risk-reducing mastectomy in women who are mutation carriers: A prospective study. *Eur J Surg Oncol* 38, 38-43, doi:10.1016/j.ejso.2011.10.010 (2012).
- 12 Brennan, W. A. & Haiavy, J. Transumbilical breast augmentation: A practical review of a growing technique. *Ann Plast Surg* 59, 243-249, doi:10.1097/SAP.0b013e318030264f (2007).
- 13 Bresser, P. J. *et al.* Satisfaction with prophylactic mastectomy and breast reconstruction in genetically predisposed women. *Plast Reconstr Surg* 117, 1675-1682; discussion 1683, doi:10.1097/01.prs.0000217383.99038.f5 (2006).
- 14 Brown, A. P., Hill, C. & Khan, K. Outcome of reduction mammoplasty--A patients' perspective. *Br J Plast Surg* 53, 584-587, doi:10.1054/bjps.2000.3380 (2000).
- 15 Cardenas-Camarena, L. Reduction mammoplasty with superolateral dermoglandular pedicle: Details of 15 years of experience. *Ann Plast Surg* 63, 255-261, doi:10.1097/SAP.0b013e31818d45c2 (2009).
- 16 Casaubon, J. T. *et al.* Breast-specific sensuality and appearance satisfaction: Comparison of breast-conserving surgery and nipple-sparing mastectomy. *J Am Coll Surg*, doi:10.1016/j.jamcollsurg.2020.02.048 (2020).
- 17 Cerovac, S., Ali, F. S., Blizard, R., Lloyd, G. & Butler, P. E. Psychosexual function in women who have undergone reduction mammoplasty. *Plast Reconstr Surg* 116, 1306-1313, doi:10.1097/01.prs.0000181698.26280.42 (2005).
- 18 Chapman, D., Britton, T. B., Purushotham, A. & Wishart, G. Post-operative complications following subareolar duct clearance. *Cancer Nursing Practice* 5, 36-39 (2006).
- 19 Chen, T. H. & Wei, F. C. Evolution of the vertical reduction mammoplasty: The S approach. *Aesthetic Plast Surg* 21, 97-104, doi:10.1007/s002669900092 (1997).
- 20 Cheng, M. S., Ho, C. M., Cheung, W. Y., Or, A. & Wong, W. M. Nipple-areola reconstruction in autologous breast reconstruction: Chinese patients' perspective. *Ann Plast Surg* 53, 328-333, doi:10.1097/01.sap.0000137247.53249.a1 (2004).
- 21 Chiari, A., Jr., Nunes, T. A., Grotting, J. C., Cotta, F. B. & Gomes, R. C. Breast sensitivity before and after the L short-scar mammoplasty. *Aesthetic Plast Surg* 36, 105-114, doi:10.1007/s00266-011-9756-2 (2012).



- 22 Cho, B. C., Yang, J. D. & Baik, B. S. Periareolar reduction mammoplasty using an inferior dermal pedicle or a central pedicle. *J Plast Reconstr Aesthet Surg* 61, 275-281, doi:10.1016/j.bjps.2007.10.024 (2008).
- 23 Coelho de Almeida, C. I. Mammoplasty with L-incision. *Aesthet Surg J* 24, 102-111, doi:10.1016/j.asj.2003.12.006 (2004).
- 24 Cornelissen, A. J. M. *et al.* Sensation of the autologous reconstructed breast improves quality of life: A pilot study. *Breast Cancer Res Treat* 167, 687-695, doi:10.1007/s10549-017-4547-3 (2018).
- 25 Cruz-Korchin, N. & Korchin, L. Vertical versus Wise pattern breast reduction: Patient satisfaction, revision rates, and complications. *Plast Reconstr Surg* 112, 1573-1578; discussion 1579, doi:10.1097/01.Prs.0000086736.61832.33. (2003).
- 26 Cruz-Korchin, N. & Korchin, L. Breast-feeding after vertical mammoplasty with medial pedicle. *Plast Reconstr Surg* 114, 890-894, doi:10.1097/01.prs.0000133174.64330.cc. (2004).
- 27 Cruz, N. I. & Korchin, L. Lactational performance after breast reduction with different pedicles. *Plast Reconstr Surg* 120, 35-40, doi:10.1097/01.prs.0000263371.37596.49. (2007).
- 28 Cruz, N. I. & Korchin, L. Breastfeeding after augmentation mammoplasty with saline implants. *Ann Plast Surg* 64, 530-533, doi:10.1097/SAP.0b013e3181c925e4. (2010).
- 29 Dahlback, C., Manjer, J., Rehn, M. & Ringberg, A. Determinants for patient satisfaction regarding aesthetic outcome and skin sensitivity after breast-conserving surgery. *World J Surg Oncol* 14, 303, doi:10.1186/s12957-016-1053-8. (2016).
- 30 Damen, T. H. *et al.* High satisfaction rates in women after DIEP flap breast reconstruction. *J Plast Reconstr Aesthet Surg* 63, 93-100, doi:10.1016/j.bjps.2008.08.019. Epub 2008 Nov 25. (2010).
- 31 De Vita, R., Buccheri, E. M., Pozzi, M. & Zoccali, G. Direct to implant breast reconstruction by using SERI, preliminary report. *J Exp Clin Cancer Res* 33, 78, doi:10.1186/s13046-014-0078-5. (2014).
- 32 Delay, E., Jorquera, F., Lucas, R. & Lopez, R. Sensitivity of breasts reconstructed with the autologous latissimus dorsi flap. *Plast Reconstr Surg* 106, 302-309; discussion 310, doi:10.1097/00006534-200008000-00009. (2000).
- 33 Didier, F. *et al.* Does nipple preservation in mastectomy improve satisfaction with cosmetic results, psychological adjustment, body image and sexuality? *Breast Cancer Res Treat* 118, 623-633, doi:10.1007/s10549-008-0238-4. Epub 2008 Nov 12. (2009).
- 34 Dixon, J. M., Kohlhardt, S. R. & Dillon, P. Total duct excision. *Breast* 7, 216-219, doi:http://dx.doi.org/10.1016/S0960-9776%2898%2990112-6 (1998).
- 35 Djohan, R. *et al.* Patient satisfaction following nipple-sparing mastectomy and immediate breast reconstruction: An 8-year outcome study. *Plast Reconstr Surg* 125, 818-829, doi:10.1097/PRS.0b013e3181ccdaa4. (2010).
- 36 Dossett, L. A. *et al.* Prospective evaluation of skin and nipple-areola sensation and patient satisfaction after nipple-sparing mastectomy. *J Surg Oncol* 114, 11-16, doi:10.1002/jso.24264. Epub 2016 Apr 18. (2016).
- 37 Edsander-Nord, A., Wickman, M. & Hansson, P. Somatosensory status after pedicled or free TRAM flap surgery: A retrospective study. *Plast Reconstr Surg* 104, 1642-1648, doi:10.1097/00006534-199911000-00005. (1999).
- 38 Edsander-Nord, A., Wickman, M. & Hansson, P. Threshold of tactile perception after nipple-sharing: A prospective study. *Scand J Plast Reconstr Surg Hand Surg* 36, 216-220, doi:10.1080/02844310260259888. (2002).
- 39 Eggert, E., Schuss, R. & Edsander-Nord, A. Clinical outcome, quality of life, patients' satisfaction, and aesthetic results, after reduction mammoplasty. *Scand J Plast Reconstr Surg Hand Surg* 43, 201-206, doi:10.1080/02844310902891513. (2009).
- 40 Eichler, C. *et al.* Lumpectomy versus mastopexy--A post-surgery patient survey. *Anticancer Res* 33, 731-736 (2013).
- 41 El-Ali, K., Dalal, M. & Kat, C. C. Modified C-V flap for nipple reconstruction: Our results in 50 patients. *J Plast Reconstr Aesthet Surg* 62, 991-996, doi:10.1016/j.bjps.2007.12.059. Epub 2008 Jul 2. (2009).
- 42 Evans, G. R. & Ryan, J. J. Reduction mammoplasty for the teenage patient: A critical analysis. *Aesthetic Plast Surg* 18, 291-297, doi:10.1007/bf00449797. (1994).
- 43 Gahm, J., Jurell, G., Wickman, M. & Hansson, P. Sensitivity after bilateral prophylactic mastectomy and immediate reconstruction. *Scand J Plast Reconstr Surg Hand Surg* 41, 178-183, doi:10.1080/02844310701383977. (2007).
- 44 Gahm, J., Hansson, P., Brandberg, Y. & Wickman, M. Breast sensibility after bilateral risk-reducing mastectomy and immediate breast reconstruction: A prospective study. *J Plast*

- Reconstr Aesthet Surg* 66, 1521-1527, doi:10.1016/j.bjps.2013.06.054. Epub 2013 Aug 13. (2013).
- 45 Ghosh, S. J., Shaw, A. D. & Watson, J. D. Nipple reconstructions: Comparison of patients' and surgeons' perspectives. *Breast* 6, 42-44, doi:http://dx.doi.org/10.1016/S0960-9776%2897%2990542-7 (1997).
- 46 Glaumann, B. Investigation of 72 patients following subcutaneous mastectomy. A clinical evaluation of current surgical techniques. *Scand J Plast Reconstr Surg* 19, 273-281, doi:10.3109/02844318509074515. (1985).
- 47 Gullo, P., Buccheri, E. M., Pozzi, M. & De Vita, R. Nipple reconstruction using a star flap enhanced by scar tissue: The Regina Elena Cancer Institute experience. *Aesthetic Plast Surg* 35, 731-737, doi:10.1007/s00266-011-9677-0. Epub 2011 Feb 20. (2011).
- 48 Hang-Fu, L. Subjective comparison of six different reduction mammoplasty procedures. *Aesthetic Plast Surg* 15, 297-302, doi:10.1007/bf02273876. (1991).
- 49 Harcourt, D. *et al.* Patient satisfaction in relation to nipple reconstruction: The importance of information provision. *J Plast Reconstr Aesthet Surg* 64, 494-499, doi:10.1016/j.bjps.2010.06.008. Epub 2010 Jul 16. (2011).
- 50 Hart, A. M., Pinell-White, X. & Losken, A. The psychosexual impact of postmastectomy breast reconstruction. *Ann Plast Surg* 77, 517-522, doi:10.1097/sap.0000000000000665. (2016).
- 51 Haslik, W., Nedomansky, J., Hacker, S., Nickl, S. & Schroegendorfer, K. F. Objective and subjective evaluation of donor-site morbidity after nipple sharing for nipple areola reconstruction. *J Plast Reconstr Aesthet Surg* 68, 168-174, doi:10.1016/j.bjps.2014.10.023. Epub 2014 Oct 27. (2015).
- 52 Hau, E. *et al.* The impact of breast cosmetic and functional outcomes on quality of life: Long-term results from the St. George and Wollongong randomized breast boost trial. *Breast Cancer Res Treat* 139, 115-123, doi:10.1007/s10549-013-2508-z. Epub 2013 Apr 12. (2013).
- 53 Hefter, W., Lindholm, P. & Elvenes, O. P. Lactation and breast-feeding ability following lateral pedicle mammoplasty. *Br J Plast Surg* 56, 746-751, doi:10.1016/s0007-1226(03)00368-0. (2003).
- 54 Hefter, W., Elvenes, O. P. & Lindholm, P. A retrospective quantitative assessment of breast sensation after lateral pedicle mammoplasty. *Br J Plast Surg* 56, 667-673, doi:10.1016/s0007-1226(03)00308-4. (2003).
- 55 Heil, J. *et al.* Change of aesthetic and functional outcome over time and their relationship to quality of life after breast conserving therapy. *Eur J Surg Oncol* 37, 116-121, doi:10.1016/j.ejso.2010.11.007. Epub 2010 Dec 3. (2011).
- 56 Krishnan, L., Stanton, A. L., Collins, C. A., Liston, V. E. & Jewell, W. R. Form or function? Part 2. Objective cosmetic and functional correlates of quality of life in women treated with breast-conserving surgical procedures and radiotherapy. *Cancer* 91, 2282-2287 (2001).
- 57 Stanton, A. L., Krishnan, L. & Collins, C. A. Form or function? Part 1. Subjective cosmetic and functional correlates of quality of life in women treated with breast-conserving surgical procedures and radiotherapy. *Cancer* 91, 2273-2281 (2001).
- 58 Hetter, G. P. Patient satisfaction following augmentation mammoplasty with the gel prosthesis. *Aesthetic Plast Surg* 3, 251-259, doi:10.1007/bf01577861. (1979).
- 59 Hintringer, T., Pilz, S. & Bauer, M. Breast reduction with superior pedicle. Follow-up of 150 breast reduction-plasties with special reference to subjective assessment by the patients. *Handchir Mikrochir Plast Chir* 26, 227-230 (1994).
- 60 Hyckel, P., Robotta, C., Thiel, H. & Schumann, D. Long-term results of the reduction mammoplasty with Revers T-technique. *Zentralbl Chir* 126, 788-792, doi:10.1055/s-2001-18258. (2001).
- 61 Hyza, P., Streit, L., Vesely, J., Stafova, D. & Sin, P. New technique of immediate nipple reconstruction during immediate autologous DIEP or MS-TRAM breast reconstruction. *Ann Plast Surg* 74, 645-651, doi:10.1097/sap.0000000000000006. (2015).
- 62 Isenberg, J. S. Sense and sensibility: Breast reconstruction with innervated TRAM flaps. *Journal of reconstructive microsurgery* 18, 023-028 (2002).
- 63 Jahkola, T. Self-perceptions of women after early breast cancer surgery. *Eur J Surg Oncol* 24, 9-14, doi:10.1016/s0748-7983(98)80116-9. (1998).
- 64 Jalini, L., Lund, J. & Kurup, V. Nipple reconstruction using the c-v flap technique: Long-term outcomes and patient satisfaction. *World J Plast Surg* 6, 68-73 (2017).
- 65 Jin, U. S. & Lee, H. K. Nipple reduction using circumcision and wedge excision technique. *Ann Plast Surg* 70, 154-157, doi:10.1097/SAP.0b013e318234e91b. (2013).
- 66 Kalaaji, A., Bjertness, C. B., Nordahl, C. & Olafsen, K. Survey of breast implant patients: Characteristics, depression rate, and quality of life. *Aesthet Surg J* 33, 252-257, doi:10.1177/1090820x12473106. Epub 2013 Jan 16. (2013).

- 67 Kaminsky, A. J., Patel, K. M., Cocilovo, C., Nahabedian, M. Y. & Miraliakbari, R. The biplanar oncoplastic technique case series: A 2-year review. *Gland Surg* 4, 257-262, doi:10.3978/j.issn.2227-684X.2015.04.07. (2015).
- 68 Khan, A., Zhang, J., Sollazzo, V., Mohammed, K. & Gui, G. Sensory change of the reconstructed breast envelope after skin-sparing mastectomy. *Eur J Surg Oncol* 42, 973-979, doi:10.1016/j.ejso.2016.03.018. Epub 2016 Apr 9. (2016).
- 69 Kim, H., Park, S. J., Woo, K. J. & Bang, S. I. Comparative study of nipple-areola complex position and patient satisfaction after unilateral mastectomy and immediate expander-implant reconstruction nipple-sparing mastectomy versus skin-sparing mastectomy. *Aesthetic Plast Surg* 43, 313-327, doi:10.1007/s00266-018-1217-8. Epub 2019 Feb 11. (2019).
- 70 Kompatscher, P., Schuler, C. & Beer, G. M. The transareolar incision for breast augmentation revisited. *Aesthetic Plast Surg* 28, 70-74, doi:10.1007/s00266-004-3105-7. Epub 2004 May 28. (2004).
- 71 Lagergren, J., Edsander-Nord, A., Wickman, M. & Hansson, P. Long-term sensibility following nonautologous, immediate breast reconstruction. *Breast J* 13, 346-351, doi:10.1111/j.1524-4741.2007.00441.x. (2007).
- 72 Lagergren, J., Wickman, M. & Hansson, P. Sensation following immediate breast reconstruction with implants. *Breast J* 16, 633-638, doi:10.1111/j.1524-4741.2010.00984.x. (2010).
- 73 Lee, C. N. *et al.* Accuracy of predictions of patients with breast cancer of future well-being after immediate breast reconstruction. *JAMA Surg* 153, e176112, doi:10.1001/jamasurg.2017.6112. Epub 2018 Apr 18. (2018).
- 74 Lee, T. J., Noh, H. J., Kim, E. K. & Eom, J. S. Reducing donor site morbidity when reconstructing the nipple using a composite nipple graft. *Arch Plast Surg* 39, 384-389, doi:10.5999/aps.2012.39.4.384. Epub 2012 Jul 13. (2012).
- 75 Spear, S. L., Schaffner, A. D., Jespersen, M. R. & Goldstein, J. A. Donor-site morbidity and patient satisfaction using a composite nipple graft for unilateral nipple reconstruction in the radiated and nonradiated breast. *Plast Reconstr Surg* 127, 1437-1446, doi:10.1097/PRS.0b013e318208d107. (2011).
- 76 Liew, S., Hunt, J. & Pennington, D. Sensory recovery following free TRAM flap breast reconstruction. *Br J Plast Surg* 49, 210-213, doi:10.1016/s0007-1226(96)90052-1. (1996).
- 77 Losken, A., Mackay, G. J. & Bostwick, J., 3rd. Nipple reconstruction using the C-V flap technique: a long-term evaluation. *Plast Reconstr Surg* 108, 361-369, doi:10.1097/00006534-200108000-00013. (2001).
- 78 Lossing, C., Brongo, S. & Holmstrom, H. Nipple reconstruction with a modified S-flap technique. *Scand J Plast Reconstr Surg Hand Surg* 32, 275-279, doi:10.1080/02844319850158606. (1998).
- 79 Magarakis, M. *et al.* Pilot study of breast sensation after breast reconstruction: Evaluating the effects of radiation therapy and perforator flap neurotization on sensory recovery. *Microsurgery* 33, 421-431, doi:10.1002/micr.22124. Epub 2013 Jul 9. (2013).
- 80 Makboul, M., Abdelhamid, M. S. & Al-Attar, G. S. Long-term follow-up and patient satisfaction after reduction mammoplasty: Superomedial versus inferior pedicle. *Indian J Plast Surg* 49, 214-219, doi:10.4103/0970-0358.191299. (2016).
- 81 Makboul, M., Abdelhamid, M. & Al-Attar, G. Long term follow up and patient satisfaction after reduction mammoplasty: Superomedial versus inferior pedicle. *World J Plast Surg* 6, 82-87 (2017).
- 82 Marconi, F. & Cavina, C. Reduction mammoplasty and correction of ptosis: A personal technique. *Plast Reconstr Surg* 91, 1046-1056, doi:10.1097/00006534-199305000-00012. (1993).
- 83 McCulley, S. J. & Rousseau, T. E. A modified Chiari L short-scar mammoplasty--The technique and results. *Br J Plast Surg* 52, 112-117, doi:10.1054/bjps.1998.3051. (1999).
- 84 Mertz, B. G., Durlaud, H. M., Kroman, N. & Andersen, K. G. Pain, sensory disturbances and psychological distress are common sequelae after treatment of ductal carcinoma in situ: A cross-sectional study. *Acta Oncol* 56, 724-729, doi:10.1080/0284186x.2017.1295167. Epub 2017 Mar 2. (2017).
- 85 Andersen, K. G., Christensen, K. B., Kehlet, H. & Bidstrup, P. E. The effect of pain on physical functioning after breast cancer treatment: development and validation of an assessment tool. *Clin J Pain* 31, 794-802, doi:10.1097/AJP.000000000000156 (2015).
- 86 Minkowitz, H. S., Onel, E., Patronella, C. K. & Smoot, J. D. A two-year observational study assessing the safety of DepoFoam bupivacaine after augmentation mammoplasty. *Aesthet Surg J* 32, 186-193, doi:10.1177/1090820x11434524. Epub 2012 Jan 11. (2012).
- 87 Mizgala, C. L. & MacKenzie, K. M. Breast reduction outcome study. *Ann Plast Surg* 44, 125-133; discussion 133, doi:10.1097/0000637-200044020-00001. (2000).

- 88 Modaffari, P. *et al.* Concerns and expectations of risk-reducing surgery in women with hereditary breast and ovarian cancer syndrome. *J Clin Med* 8, doi:10.3390/jcm8030313 10.3390/jcm8030313. (2019).
- 89 Moscona, R. A., Holander, L., Or, D. & Fodor, L. Patient satisfaction and aesthetic results after pedicled transverse rectus abdominis muscle flap for breast reconstruction. *Ann Surg Oncol* 13, 1739-1746, doi:10.1245/s10434-006-9096-7. Epub 2006 Sep 29. (2006).
- 90 Mueller, F. E. Late results of Strombeck's mammoplasty. A follow up study of 100 patients. *Plastic and Reconstructive Surgery* 54, 664-666 (1974).
- 91 Nahabedian, M. Y. & Tsangaris, T. N. Breast reconstruction following subcutaneous mastectomy for cancer: A critical appraisal of the nipple-areola complex. *Plast Reconstr Surg* 117, 1083-1090, doi:10.1097/01.prs.0000202103.78284.97. (2006).
- 92 Negosanti, L., Santoli, M., Sgarzani, R., Palo, S. & Cipriani, R. Return of sensitivity and outcome evaluation of breast reconstruction with the DIEP free flap. *Plast Reconstr Surg* 126, 36e-38e, doi:10.1097/PRS.0b013e3181dab346. (2010).
- 93 Nguyen, J. T., Palladino, H., Sonnema, A. J. & Petty, P. M. Long-term satisfaction of reduction mammoplasty for bilateral symptomatic macromastia in younger patients. *J Adolesc Health* 53, 112-117, doi:10.1016/j.jadohealth.2013.01.025. Epub 2013 Mar 21. (2013).
- 94 Niechajev, I., Jurell, G. & Lohjelm, L. Prospective study comparing two brands of cohesive gel breast implants with anatomic shape: 5-year follow-up evaluation. *Aesthetic Plast Surg* 31, 697-710, doi:10.1007/s00266-006-0057-0. (2007).
- 95 Okwueze, M. I. *et al.* Effect of augmentation mammoplasty on breast sensation. *Plast Reconstr Surg* 117, 73-83; discussion 84, doi:10.1097/01.prs.0000191202.19657.6d. (2006).
- 96 Osinga, R. *et al.* Long-term outcome after surgical treatment of breast asymmetry: Analysis of the patient's perspective in 51 cases. *Handchir Mikrochir Plast Chir* 46, 330-335, doi:10.1055/s-0034-1394426. Epub 2014 Nov 20. (2014).
- 97 Osinga, R. *et al.* Long-term outcome analysis of subjective and objective parameters after breast reduction in 159 cases: Patients judge differently from plastic surgeons. *Handchir Mikrochir Plast Chir* 49, 399-404, doi:10.1055/s-0043-112747. Epub 2017 Oct 26. (2017).
- 98 Otterburn, D. M., Sikora, K. E. & Losken, A. An outcome evaluation following postmastectomy nipple reconstruction using the C-V flap technique. *Ann Plast Surg* 64, 574-578, doi:10.1097/SAP.0b013e3181c01290. (2010).
- 99 Ou, K. W. *et al.* Oncological safety and outcomes of nipple-sparing mastectomy with breast reconstruction: A single-centered experience in Taiwan. *Ann Plast Surg* 74 Suppl 2, S127-131, doi:10.1097/sap.0000000000000458. (2015).
- 100 Pan, L. *et al.* Oncologic outcomes and radiation safety of nipple-sparing mastectomy with intraoperative radiotherapy for breast cancer. *Breast Cancer* 26, 618-627, doi:10.1007/s12282-019-00962-7. Epub 2019 Mar 19. (2019).
- 101 Pek, W. S. *et al.* Immediate breast reconstruction following nipple-sparing mastectomy in an Asian population: Aesthetic outcomes and mitigating nipple-areolar complex necrosis. *Arch Plast Surg* 45, 229-238, doi:10.5999/aps.2017.01067. Epub 2018 May 15. (2018).
- 102 Peled, A. W. *et al.* Patient-reported outcomes and satisfaction after total skin-sparing mastectomy and immediate expander-implant reconstruction. *Ann Plast Surg* 72 Suppl 1, S48-52, doi:10.1097/sap.0000000000000020. (2014).
- 103 Peters, W., Smith, D., Fornasier, V., Lugowski, S. & Ibanez, D. An outcome analysis of 100 women after explantation of silicone gel breast implants. *Ann Plast Surg* 39, 9-19, doi:10.1097/0000637-199707000-00002. (1997).
- 104 Petit, J. Y. *et al.* When mastectomy becomes inevitable: The nipple-sparing approach. *Breast* 14, 527-531, doi:10.1016/j.breast.2005.08.028. Epub 2005 Oct 12. (2005).
- 105 Petit, J. Y. *et al.* Nipple-sparing mastectomy in association with intra operative radiotherapy (ELIOT): A new type of mastectomy for breast cancer treatment. *Breast Cancer Res Treat* 96, 47-51, doi:10.1007/s10549-005-9033-7. Epub 2005 Oct 27. (2006).
- 106 Pickford, M. A. & Boorman, J. G. Early experience with the Lejour vertical scar reduction mammoplasty technique. *Br J Plast Surg* 46, 516-522, doi:10.1016/0007-1226(93)90228-4. (1993).
- 107 Przybilski, R. Late results of reduction mammoplasty using the T or L incision. *Z Plast Chir* 5, 93-101 (1981).
- 108 Puonti, H. K., Jaaskelainen, S. K., Hallikainen, H. K. & Partanen, T. A. A new approach to microvascular TRAM-flap breast reconstruction--A pilot study. *J Plast Reconstr Aesthet Surg* 64, 346-352, doi:10.1016/j.bjps.2010.05.011. Epub 2010 Jun 12. (2011).
- 109 Ren, M., Wang, Y. & Wang, B. Nipple reduction using a three-dimensional Z-shaped incision technique. *J Plast Reconstr Aesthet Surg* 66, 770-775, doi:10.1016/j.bjps.2013.02.034. Epub 2013 Apr 16. (2013).

- 110 Robertson, S., Wengstrom, Y., Eriksen, C. & Sandelin, K. Breast surgeons performing immediate breast reconstruction with implants - Assessment of resource-use and patient-reported outcome measures. *Breast* 21, 590-596, doi:10.1016/j.breast.2012.01.003. Epub 2012 Jan 25. (2012).
- 111 Sandsmark, M., Amland, P. F. & Abyholm, F. Reduction mammoplasty in breast hypertrophy. *Tidsskr Nor Laegeforen* 112, 1945-1949 (1992).
- 112 Schratt, J., Binter, A. & Rab, M. Reduction mammoplasty with a superior pedicle - A retrospective 10-year follow-up analysis of 33 patients. *Handchir Mikrochir Plast Chir* 46, 325-329, doi:10.1055/s-0034-1385934. Epub 2014 Nov 20. (2014).
- 113 Serletti, J. M., Reading, G., Caldwell, E. & Wray, R. C. Long-term patient satisfaction following reduction mammoplasty. *Ann Plast Surg* 28, 363-365, doi:10.1097/00000637-199204000-00011. (1992).
- 114 Shaffer, K. *et al.* Patient satisfaction following nipple-sparing mastectomy and assessment of nipple-areolar sensation. *Breast J* 25, 542-544, doi:10.1111/tbj.13274. Epub 2019 Apr 18. (2019).
- 115 Shaikh-Naidu, N., Preminger, B. A., Rogers, K., Messina, P. & Gayle, L. B. Determinants of aesthetic satisfaction following TRAM and implant breast reconstruction. *Ann Plast Surg* 52, 465-470; discussion 470, doi:10.1097/01.sap.0000123901.06133.b7. (2004).
- 116 Shan, X. Y. *et al.* Follow-up observational study of "bi-ring method" breast surgery for treating hypermastia and mastoptosis. *Clin Exp Obstet Gynecol* 43, 57-62 (2016).
- 117 Shaw, W. W., Orringer, J. S., Ko, C. Y., Ratto, L. L. & Mersmann, C. A. The spontaneous return of sensibility in breasts reconstructed with autologous tissues. *Plast Reconstr Surg* 99, 394-399, doi:10.1097/00006534-199702000-00013. (1997).
- 118 Shi, H., Cao, C., Li, X., Chen, L. & Li, S. A retrospective study of primary breast augmentation: Recovery period, complications and patient satisfaction. *Int J Clin Exp Med* 8, 18737-18743 (2015).
- 119 Shiau, J. P., Chin, C. C., Lin, M. H. & Hsiao, C. W. Correction of severely inverted nipple with telescope method. *Aesthetic Plast Surg* 35, 1137-1142, doi:10.1007/s00266-011-9739-3. Epub 2011 May 10. (2011).
- 120 Smoll, N. R., Marne, B., Maung, H., Findlay, M. W. & Hunter-Smith, D. J. Nipple sensation losses in Hall-Findlay breast reduction technique. *Plast Reconstr Surg* 131, 461e-462e, doi:10.1097/PRS.0b013e31827c739f. (2013).
- 121 Stokes, R. B. Breast augmentation in thin women: Patient satisfaction with saline-filled implants. *Aesthetic Plast Surg* 28, 153-157, doi:10.1007/s00266-004-4018-1. Epub 2004 Aug 3. (2004).
- 122 Struckmann, V. *et al.* The free fasciocutaneous infragluteal (FCI) flap: Outcome and patient satisfaction after 142 breast reconstructions. *J Plast Reconstr Aesthet Surg* 69, 461-469, doi:10.1016/j.bjps.2015.12.010 10.1016/j.bjps.2015.12.010. Epub 2016 Jan 9. (2016).
- 123 Swanson, E. Prospective outcome study of 106 cases of vertical mastopexy, augmentation/mastopexy, and breast reduction. *J Plast Reconstr Aesthet Surg* 66, 937-949, doi:10.1016/j.bjps.2013.03.021. Epub 2013 Apr 10. (2013).
- 124 Swanson, E. Prospective outcome study of 225 cases of breast augmentation. *Plast Reconstr Surg* 131, 1158-1166, doi:10.1097/PRS.0b013e318287a0e1. (2013).
- 125 Swanson, E. All seasons vertical augmentation mastopexy: A simple algorithm, clinical experience, and patient-reported outcomes. *Plast Reconstr Surg Glob Open* 4, e1170, doi:10.1097/gox.0000000000001170. eCollection 2016 Dec. (2016).
- 126 Tairyh, G., Happak, W., Girsch, W. & Deutinger, M. Results after reduction mammoplasty with a short L-shaped scar. *Acta Chirurgica Austriaca* 30, 96-101 (1998).
- 127 Tairyh, G., Woresg, A., Kuzbari, R., Deutinger, M. & Holle, J. A comparison of long-term outcome of 6 techniques of breast reduction. *Handchir Mikrochir Plast Chir* 32, 159-165, doi:10.1055/s-2000-10926. (2000).
- 128 Temel, M., Karakas, A. O., Dokuyucu, R. & Turkmen, A. "The dermal internal brassiere flap," a new modification of inferior pedicle breast reduction technic. *Aesthetic Plast Surg* 39, 350-358, doi:10.1007/s00266-015-0483-y. Epub 2015 Apr 17. (2015).
- 129 Temple, C. L. *et al.* Sensibility following innervated free TRAM flap for breast reconstruction: Part II. Innervation improves patient-rated quality of life. *Plast Reconstr Surg* 124, 1419-1425, doi:10.1097/PRS.0b013e3181b98963. (2009).
- 130 Unukovich, D. *et al.* Physical therapy after prophylactic mastectomy with breast reconstruction: A prospective randomized study. *Breast* 23, 357-363, doi:10.1016/j.breast.2014.01.010. Epub 2014 Feb 10. (2014).
- 131 van Verschuer, V. M. *et al.* Patient satisfaction and nipple-areola sensitivity after bilateral prophylactic mastectomy and immediate implant breast reconstruction in a high breast cancer risk population: Nipple-sparing mastectomy versus skin-sparing mastectomy. *Ann Plast Surg* 77, 145-152, doi:10.1097/sap.0000000000000366. (2016).

- 132 von Sperling, M. L., Hoimyr, H., Finnerup, K., Jensen, T. S. & Finnerup, N. B. Chronic postoperative pain and sensory changes following reduction mammoplasty. *Scand J Pain* 2, 57-61, doi:10.1016/j.sjpain.2011.01.002. (2011).
- 133 von Sperling, M. L., Hoimyr, H., Finnerup, K., Jensen, T. S. & Finnerup, N. B. Persistent pain and sensory changes following cosmetic breast augmentation. *Eur J Pain* 15, 328-332, doi:10.1016/j.ejpain.2010.07.004. Epub 2010 Aug 19. (2011).
- 134 Wolter, A. *et al.* Mastopexy in massive weight loss patients - Extended ribeiro technique and usage of the lateral intercostal artery perforator flap (LICAP flap) for autoaugmentation. *Handchir Mikrochir Plast Chir* 49, 380-389, doi:10.1055/s-0043-114005. Epub 2017 Aug 1. (2017).
- 135 Wolter, A. *et al.* Ribeiro-technique in gigantomastia - Review of 294 reduction mammoplasties in 8 years. *Handchir Mikrochir Plast Chir* 49, 390-398, doi:10.1055/s-0043-113132. Epub 2017 Aug 1. (2017).
- 136 Yueh, J. H. *et al.* Nipple-sparing mastectomy: Evaluation of patient satisfaction, aesthetic results, and sensation. *Ann Plast Surg* 62, 586-590, doi:10.1097/SAP.0b013e31819fb1ac. (2009).
- 137 Zelken, J., Huang, J. J., Wu, C. W., Lin, Y. L. & Cheng, M. H. The transareolar-periareolar approach. *Plast Reconstr Surg Glob Open* 4, e1020, doi:10.1097/gox.0000000000001020. eCollection 2016 Sep. (2016).
- 138 Zenn, M. R. & Garofalo, J. A. Unilateral nipple reconstruction with nipple sharing: Time for a second look. *Plast Reconstr Surg* 123, 1648-1653, doi:10.1097/PRS.0b013e3181a3f2f9. (2009).
